# Supplementary material for: A computationally designed titanium-mediated amination of allylic alcohols for the synthesis of secondary allylamines
Source: Royal Society of Chemistry journal article supplement (doi:10.1039/c5ra18503c), 2015-01-01
Supplement: c5ra18503c1.pdf [file c5ra18503c1.pdf]

## *Supporting Information*

### **A Computationally Designed Titanium-Mediated Amination of Allylic Alcohols for the Synthesis of Secondary Allylamines**

Zunming Sun, Qingxia Wang, Yi Xu, and Zhihong Wang\*

State Key Laboratory and Institute of Elemento-Organic Chemistry, Nankai University,  
Tianjin 300071, China

#### Computational Details

All calculations were performed using Gaussian 09, Revision A.01, M. J. Frisch, G. W. Trucks, H. B. Schlegel, G. E. Scuseria, M. A. Robb, J. R. Cheeseman, G. Scalmani, V. Barone, B. Mennucci, G. A. Petersson, H. Nakatsuji, M. Caricato, X. Li, H. P. Hratchian, A. F. Izmaylov, J. Bloino, G. Zheng, J. L. Sonnenberg, M. Hada, M. Ehara, K. Toyota, R. Fukuda, J. Hasegawa, M. Ishida, T. Nakajima, Y. Honda, O. Kitao, H. Nakai, T. Vreven, J. A. Montgomery, Jr., J. E. Peralta, F. Ogliaro, M. Bearpark, J. J. Heyd, E. Brothers, K. N. Kudin, V. N. Staroverov, R. Kobayashi, J. Normand, K. Raghavachari, A. Rendell, J. C. Burant, S. S. Iyengar, J. Tomasi, M. Cossi, N. Rega, J. M. Millam, M. Klene, J. E. Knox, J. B. Cross, V. Bakken, C. Adamo, J. Jaramillo, R. Gomperts, R. E. Stratmann, O. Yazyev, A. J. Austin, R. Cammi, C. Pomelli, J. W. Ochterski, R. L. Martin, K. Morokuma, V. G. Zakrzewski, G. A. Voth, P. Salvador, J. J. Dannenberg, S. Dapprich, A. D. Daniels, O. Farkas, J. B. Foresman, J. V. Ortiz, J. Cioslowski, and D. J. Fox, Gaussian, Inc., Wallingford CT, 2009.

Full geometrical optimizations were carried out using Gaussian 09 suite of programs, employing the Minnesota density functional M06. The 6-31++G\*\* basis set was used on nonmetallic atoms while the SDD basis set was employed on Ti and I. The solvent effect was dealt with using conductor-like polarizable continuum model (CPCM) in toluene. Frequency calculations were performed at the same level to identify all of the stationary points as minima (zero imaginary frequency) or transition states (one imaginary frequency) and intrinsic reaction coordinates (IRC) were calculated for each transition state to confirm that the structure indeed connects the two relevant minima.

Cartesian coordinates and energetics for all stationary points are given below.

# Part I: structures in the reaction of titanium imido chloride

## 1. Reaction of allylic alcohol with aniline

### Allylic alcohol

|                                              |                             |
|----------------------------------------------|-----------------------------|
| Zero-point correction=                       | 0.084494 (Hartree/Particle) |
| Thermal correction to Energy=                | 0.089592                    |
| Thermal correction to Enthalpy=              | 0.090536                    |
| Thermal correction to Gibbs Free Energy=     | 0.057216                    |
| Sum of electronic and zero-point Energies=   | -192.918092                 |
| Sum of electronic and thermal Energies=      | -192.912995                 |
| Sum of electronic and thermal Enthalpies=    | -192.912050                 |
| Sum of electronic and thermal Free Energies= | -192.945370                 |

|       | E (Thermal)<br>KCal/Mol | CV<br>Cal/Mol-Kelvin | S<br>Cal/Mol-Kelvin |
|-------|-------------------------|----------------------|---------------------|
| Total | 56.220                  | 16.641               | 70.128              |
| C     | 1.834349365927          | 0.073525298308       | -0.213411627158     |
| H     | 1.940368046369          | 1.075047352826       | -0.629700530125     |
| H     | 2.727004634983          | -0.546202730171      | -0.190163216651     |
| C     | 0.664431794847          | -0.363483215108      | 0.248592732148      |
| H     | 0.570007125034          | -1.373661427263      | 0.651134329022      |
| C     | -0.579072621731         | 0.457053031499       | 0.279157114469      |
| H     | -0.407982640663         | 1.417835829534       | -0.232717964840     |
| H     | -0.845673516877         | 0.680112296366       | 1.325757608731      |
| O     | -1.620084660170         | -0.282757023160      | -0.343334026966     |
| H     | -2.458835527723         | 0.165403587157       | -0.188663418597     |

### Starting material

|                                              |                             |
|----------------------------------------------|-----------------------------|
| Zero-point correction=                       | 0.287997 (Hartree/Particle) |
| Thermal correction to Energy=                | 0.308479                    |
| Thermal correction to Enthalpy=              | 0.309423                    |
| Thermal correction to Gibbs Free Energy=     | 0.237370                    |
| Sum of electronic and zero-point Energies=   | -1534.960115                |
| Sum of electronic and thermal Energies=      | -1534.939634                |
| Sum of electronic and thermal Enthalpies=    | -1534.938689                |
| Sum of electronic and thermal Free Energies= | -1535.010743                |

|  | E (Thermal)<br>KCal/Mol | CV<br>Cal/Mol-Kelvin | S<br>Cal/Mol-Kelvin |
|--|-------------------------|----------------------|---------------------|
|--|-------------------------|----------------------|---------------------|

| Total | 193.574         | 72.558          | 151.650         |
|-------|-----------------|-----------------|-----------------|
| C     | 2.683464017109  | 0.082945243315  | -1.010000357860 |
| C     | 2.092343361779  | 0.000715362209  | 0.266174223340  |
| C     | 2.926343237028  | -0.088847703676 | 1.395593204408  |
| C     | 4.309109921866  | -0.092051729411 | 1.247564567541  |
| C     | 4.886939354924  | -0.005615511703 | -0.019439780152 |
| C     | 4.066496730249  | 0.080706029050  | -1.145454975707 |
| H     | 2.029968314777  | 0.147739380455  | -1.879913120505 |
| H     | 2.467263856258  | -0.154205500865 | 2.380057915526  |
| H     | 4.942458206405  | -0.160348630102 | 2.129847514208  |
| H     | 5.968774904550  | -0.006585820427 | -0.129166325370 |
| H     | 4.509129917350  | 0.147404141148  | -2.137410609374 |
| N     | 0.722597040300  | 0.006769336410  | 0.389887498010  |
| C     | -0.194807442275 | 2.925705308290  | -0.682497944518 |
| H     | -0.308082946366 | 4.014422282072  | -0.587266695286 |
| H     | 0.812814966648  | 2.632975546744  | -0.375073295877 |
| H     | -0.335718851643 | 2.643449186055  | -1.730864742921 |
| C     | -2.554980102747 | 2.681816385521  | -0.157539970257 |
| H     | -2.795520587634 | 2.427520259700  | -1.194845718559 |
| H     | -3.266682431063 | 2.180871660244  | 0.505709764403  |
| H     | -2.643098205297 | 3.768950710431  | -0.027846021612 |
| Cl    | -2.109394735370 | 0.028415942575  | 2.192759036193  |
| Cl    | -1.434743532192 | -0.015944351226 | -2.112683055414 |
| N     | -1.189888261392 | 2.217990068894  | 0.141676407128  |
| H     | -0.995756078650 | 2.434442747118  | 1.120679029982  |
| N     | -1.187125309751 | -2.206611862094 | 0.180134111757  |
| H     | -0.983192114718 | -2.405892222868 | 1.160820856456  |
| C     | -2.553977889627 | -2.678281670078 | -0.098423001022 |
| H     | -3.261582725772 | -2.166399607608 | 0.560776400933  |
| H     | -2.803424646731 | -2.445699964502 | -1.138741613548 |
| H     | -2.638725254783 | -3.762837529827 | 0.053167897550  |
| Ti    | -0.943334937689 | 0.004757100881  | 0.154947094520  |
| C     | -0.199331426955 | -2.928535737318 | -0.641135512497 |
| H     | -0.355710833910 | -2.670945316045 | -1.693616562142 |
| H     | 0.811367846703  | -2.625918611039 | -0.354000810230 |
| H     | -0.306929361373 | -4.015197922547 | -0.519892409085 |

## Reaction complex

|                                          |                             |
|------------------------------------------|-----------------------------|
| Zero-point correction=                   | 0.279633 (Hartree/Particle) |
| Thermal correction to Energy=            | 0.299301                    |
| Thermal correction to Enthalpy=          | 0.300246                    |
| Thermal correction to Gibbs Free Energy= | 0.231506                    |

|                                              |              |
|----------------------------------------------|--------------|
| Sum of electronic and zero-point Energies=   | -1592.883498 |
| Sum of electronic and thermal Energies=      | -1592.863829 |
| Sum of electronic and thermal Enthalpies=    | -1592.862885 |
| Sum of electronic and thermal Free Energies= | -1592.931625 |

|       | E (Thermal)<br>KCal/Mol | CV<br>Cal/Mol-Kelvin | S<br>Cal/Mol-Kelvin |
|-------|-------------------------|----------------------|---------------------|
| Total | 187.814                 | 71.558               | 144.675             |
| C     | -2.327712252222         | -1.153562240417      | -0.920686540528     |
| C     | -1.751611550444         | -0.736011808278      | 0.294490133201      |
| C     | -2.564107068608         | -0.650815364288      | 1.438853118519      |
| C     | -3.915106060592         | -0.969068112270      | 1.364070963256      |
| C     | -4.480481812279         | -1.382347916818      | 0.156467997426      |
| C     | -3.679441454824         | -1.473748112030      | -0.982680415655     |
| H     | -1.693185935550         | -1.208841945996      | -1.805447834216     |
| H     | -2.114692551299         | -0.323734211928      | 2.374292902399      |
| H     | -4.533726142209         | -0.895893514569      | 2.256322271390      |
| H     | -5.537367915159         | -1.632966440134      | 0.103979265195      |
| H     | -4.112108181009         | -1.794988980118      | -1.928188140943     |
| N     | -0.422685198552         | -0.391476973250      | 0.347351300250      |
| C     | 1.317622438446          | -2.790512016004      | -0.874706952317     |
| H     | 1.780752183317          | -3.786554083917      | -0.876702973981     |
| H     | 0.276702355893          | -2.869552047275      | -0.551320321518     |
| H     | 1.340778557434          | -2.382449830333      | -1.890436145962     |
| C     | 3.489255471996          | -1.878358412475      | -0.277530642459     |
| H     | 3.637798790379          | -1.495776323931      | -1.292240541596     |
| H     | 4.014655019489          | -1.229367361368      | 0.429288664915      |
| H     | 3.903840372677          | -2.893176641681      | -0.213994235309     |
| Cl    | 2.314803837477          | 0.341472739289       | 2.217392218256      |
| Cl    | 1.629723946638          | 0.496562786847       | -2.057187553298     |
| N     | 2.046430740324          | -1.876837866552      | 0.023905714447      |
| H     | 1.928847256084          | -2.218873716164      | 0.979403064759      |
| Ti    | 1.162670571765          | 0.134343403005       | 0.187998731549      |
| C     | 0.070147910103          | 3.158738759985       | -0.420197149687     |
| H     | 0.671459820046          | 3.389121454745       | -1.310268342516     |
| H     | -0.109322584548         | 4.079303325227       | 0.148016549603      |
| O     | 0.837253010960          | 2.260615052244       | 0.421675740362      |
| H     | 1.597798701878          | 2.720244799357       | 0.804496722713      |
| C     | -1.216678522261         | 2.508797960086       | -0.790591232731     |
| H     | -1.155555080067         | 1.658433115498       | -1.470678337212     |
| C     | -2.397014891531         | 2.927681437713       | -0.336896482748     |
| H     | -2.478009509963         | 3.773362872345       | 0.345596152881      |
| H     | -3.323521273790         | 2.437054213454       | -0.628622668436     |

## TS [3,3]

|                                              |                             |
|----------------------------------------------|-----------------------------|
| Zero-point correction=                       | 0.276211 (Hartree/Particle) |
| Thermal correction to Energy=                | 0.297274                    |
| Thermal correction to Enthalpy=              | 0.298219                    |
| Thermal correction to Gibbs Free Energy=     | 0.225121                    |
| Sum of electronic and zero-point Energies=   | -1592.839156                |
| Sum of electronic and thermal Energies=      | -1592.818092                |
| Sum of electronic and thermal Enthalpies=    | -1592.817148                |
| Sum of electronic and thermal Free Energies= | -1592.890245                |

|       | E (Thermal)<br>KCal/Mol | CV<br>Cal/Mol-Kelvin | S<br>Cal/Mol-Kelvin |
|-------|-------------------------|----------------------|---------------------|
| Total | 186.542                 | 75.622               | 153.846             |
| C     | 0.4592277240            | 2.5581878193         | -1.0012826852       |
| C     | 0.1383344669            | 3.2896815059         | 0.1242876950        |
| C     | -1.2006669356           | 3.4740844365         | 0.4292814009        |
| H     | 1.4909073930            | 2.3988746119         | -1.3013448984       |
| H     | 0.9065968057            | 3.5291054911         | 0.8570920649        |
| H     | -0.3045009207           | 2.3373874231         | -1.7459431478       |
| N     | 0.4748618469            | 0.4367845314         | -0.2805710787       |
| C     | 1.8258965014            | 0.1344588015         | -0.2076745875       |
| C     | 2.5097469587            | 0.1786885604         | 1.0201144043        |
| C     | 2.5401760743            | -0.2080223597        | -1.3705865612       |
| C     | 3.8658629767            | -0.1252542454        | 1.0785218063        |
| H     | 1.9508166223            | 0.4443822260         | 1.9161798194        |
| C     | 3.8948054766            | -0.5135997907        | -1.3010329754       |
| H     | 2.0070709895            | -0.2336650860        | -2.3206993477       |
| C     | 4.5648139629            | -0.4737883110        | -0.0775511850       |
| H     | 4.3813341424            | -0.0915792103        | 2.0361755931        |
| H     | 4.4325649892            | -0.7835867980        | -2.2076710761       |
| H     | 5.6243699140            | -0.7124104381        | -0.0258901174       |
| H     | -1.5045994554           | 3.9923456256         | 1.3339428879        |
| H     | -1.9501537830           | 3.3750438431         | -0.3522533972       |
| C     | -2.3864455822           | -2.8174738025        | -0.4505765027       |
| H     | -2.4053753076           | -3.0937041419        | 0.6085473538        |
| H     | -3.2626249917           | -2.2021369166        | -0.6768697765       |
| H     | -2.4226755804           | -3.7323830214        | -1.0577007586       |
| C     | 0.0342058230            | -2.8853804951        | -0.5009733375       |
| H     | 0.9334610914            | -2.3385219018        | -0.7994188513       |
| H     | 0.1105437498            | -3.1263653530        | 0.5638128119        |
| H     | -0.0295908744           | -3.8191874605        | -1.0768659492       |

|    |               |               |               |
|----|---------------|---------------|---------------|
| N  | -1.1585379216 | -2.0508671892 | -0.7200661260 |
| H  | -1.1779288134 | -1.7769515213 | -1.7032105217 |
| O  | -1.7645672371 | 1.5935629391  | 1.0871911777  |
| H  | -2.6961056775 | 1.6632687478  | 1.3340446518  |
| Ti | -1.1242990316 | -0.0059308544 | 0.2505593830  |
| Cl | -2.5872270110 | 0.4515684234  | -1.5938943280 |
| Cl | -0.9779533856 | -1.1867390892 | 2.2309111592  |

## TS [ 2+2 ]

|                                              |                             |
|----------------------------------------------|-----------------------------|
| Zero-point correction=                       | 0.280537 (Hartree/Particle) |
| Thermal correction to Energy=                | 0.300308                    |
| Thermal correction to Enthalpy=              | 0.301252                    |
| Thermal correction to Gibbs Free Energy=     | 0.231249                    |
| Sum of electronic and zero-point Energies=   | -1592.842449                |
| Sum of electronic and thermal Energies=      | -1592.822679                |
| Sum of electronic and thermal Enthalpies=    | -1592.821735                |
| Sum of electronic and thermal Free Energies= | -1592.891737                |

|       | E (Thermal)<br>KCal/Mol | CV<br>Cal/Mol-Kelvin | S<br>Cal/Mol-Kelvin |
|-------|-------------------------|----------------------|---------------------|
| Total | 188.446                 | 72.325               | 147.332             |
| C     | 0.2307452967            | -1.7021113010        | -1.3747451889       |
| H     | 0.8253127649            | -1.2838108874        | -2.1837854713       |
| H     | 0.7108386247            | -2.5178063513        | -0.8323155254       |
| N     | 0.7860690651            | -0.3835086880        | -0.0517834107       |
| C     | -1.1734626068           | -1.6920323552        | -1.5056691239       |
| H     | -1.6303143014           | -1.2089472734        | -2.3664575364       |
| C     | 2.1599314507            | -0.2408037655        | -0.0331417864       |
| C     | 2.8373528727            | -0.4403282232        | 1.1838256555        |
| C     | 2.8988366863            | 0.1416466386         | -1.1674042637       |
| C     | 4.2129862745            | -0.2597714471        | 1.2588027681        |
| H     | 2.2557681075            | -0.7302823799        | 2.0568276517        |
| C     | 4.2766884514            | 0.3119749263         | -1.0828877756       |
| H     | 2.3889070167            | 0.3104442562         | -2.1146166467       |
| C     | 4.9396991891            | 0.1125108829         | 0.1273246893        |
| H     | 4.7226439919            | -0.4137468669        | 2.2074550687        |
| H     | 4.8359564191            | 0.6067541415         | -1.9682071356       |
| H     | 6.0168003835            | 0.2470127108         | 0.1889009959        |
| C     | -1.9916973565           | -2.6135242968        | -0.6571855799       |
| H     | -1.7268787292           | -3.6766102046        | -0.7380335986       |
| H     | -3.0598951744           | -2.4795889158        | -0.8522002600       |
| C     | -0.4030515462           | 2.2271334166         | -1.7042120681       |

|    |               |               |               |
|----|---------------|---------------|---------------|
| H  | -1.3879670752 | 2.1186837071  | -2.1704300644 |
| H  | -0.0189388331 | 3.2351953279  | -1.9106211754 |
| H  | 0.2826461759  | 1.4926095576  | -2.1412938806 |
| C  | -1.3805817652 | 3.0247897485  | 0.3694395259  |
| H  | -2.3877032318 | 2.9623005292  | -0.0503342485 |
| H  | -1.4396951024 | 2.8388659223  | 1.4446716198  |
| H  | -0.9648492308 | 4.0246837114  | 0.1850223283  |
| O  | -1.6702306590 | -2.1728875810 | 0.689130709   |
| H  | -2.4267783905 | -2.1856250942 | 1.2917511954  |
| N  | -0.5341946322 | 1.9925887432  | -0.2562616265 |
| H  | 0.3959690210  | 2.0685763454  | 0.1569839285  |
| Ti | -0.9478252671 | -0.1692612353 | 0.1085437401  |
| Cl | -1.2059789003 | 0.1854084241  | 2.3948429524  |
| Cl | -3.2178839894 | 0.4650068768  | -0.5544134620 |

## [ 2+2 ] intermediate

|                                              |                             |
|----------------------------------------------|-----------------------------|
| Zero-point correction=                       | 0.281745 (Hartree/Particle) |
| Thermal correction to Energy=                | 0.301456                    |
| Thermal correction to Enthalpy=              | 0.302400                    |
| Thermal correction to Gibbs Free Energy=     | 0.234159                    |
| Sum of electronic and zero-point Energies=   | -1592.867662                |
| Sum of electronic and thermal Energies=      | -1592.847951                |
| Sum of electronic and thermal Enthalpies=    | -1592.847007                |
| Sum of electronic and thermal Free Energies= | -1592.915248                |

|       | E (Thermal)<br>KCal/Mol | CV<br>Cal/Mol-Kelvin | S<br>Cal/Mol-Kelvin |
|-------|-------------------------|----------------------|---------------------|
| Total | 189.167                 | 72.872               | 143.626             |
| C     | 0.2601679492            | -2.0368150923        | -0.8622805489       |
| H     | 0.7032910933            | -2.0527493381        | -1.8728348595       |
| H     | 0.5995987239            | -2.9486680804        | -0.3356144299       |
| C     | -1.2430033187           | -1.8887493492        | -0.9273379826       |
| H     | -1.6744157077           | -1.8044095676        | -1.9261425314       |
| C     | 2.0039745203            | -0.5049826151        | 0.0003423206        |
| C     | 2.3882138387            | 0.5646708271         | 0.8369178870        |
| C     | 3.0153815143            | -1.1947853078        | -0.6973102559       |
| C     | 3.7214126321            | 0.9401382292         | 0.9448633492        |
| H     | 1.6313938797            | 1.0642537539         | 1.4412646629        |
| C     | 4.3470358131            | -0.8101251534        | -0.5769650342       |
| H     | 2.7625354736            | -2.0402263673        | -1.3316501077       |
| C     | 4.7121958322            | 0.2617725718         | 0.2348655282        |
| H     | 3.9894600735            | 1.7651657188         | 1.6016699889        |

|    |               |               |               |
|----|---------------|---------------|---------------|
| H  | 5.1090904398  | -1.3592973899 | -1.1264007287 |
| H  | 5.7547378623  | 0.5569216857  | 0.3228171267  |
| C  | -0.1285865206 | 1.4884469644  | -2.2779570232 |
| H  | -1.1339276149 | 1.3788462155  | -2.6982436439 |
| H  | 0.3745281978  | 2.3291526343  | -2.7727310864 |
| H  | 0.4431728837  | 0.5729755774  | -2.4648963693 |
| C  | -0.8517963323 | 3.0328888681  | -0.5388958060 |
| H  | -0.2772314295 | 3.8393098724  | -1.0127698134 |
| H  | -1.8735114728 | 3.0388069329  | -0.9278927596 |
| H  | -0.8862349715 | 3.1908964604  | 0.5423334472  |
| C  | -2.0759443181 | -2.6052228587 | 0.0814169648  |
| H  | -1.7563315455 | -3.6250094353 | 0.3458674020  |
| H  | -3.1338726782 | -2.6142254937 | -0.2036401711 |
| N  | 0.6647534980  | -0.8384767647 | -0.1228983590 |
| O  | -1.8980595665 | -1.7612394858 | 1.2590916865  |
| H  | -2.6669741199 | -1.7139715854 | 1.8420308507  |
| N  | -0.2361573978 | 1.7232560811  | -0.8248202837 |
| H  | 0.7182363246  | 1.7477809734  | -0.4531893178 |
| Ti | -1.0783419847 | -0.0481535558 | 0.1514510524  |
| Cl | -0.9510680669 | 0.8317121248  | 2.2835825403  |
| Cl | -3.1494825044 | 0.5882649492  | -0.6994396954 |

## TS retro-[ 2+2 ]

|                                              |                             |
|----------------------------------------------|-----------------------------|
| Zero-point correction=                       | 0.280248 (Hartree/Particle) |
| Thermal correction to Energy=                | 0.299633                    |
| Thermal correction to Enthalpy=              | 0.300577                    |
| Thermal correction to Gibbs Free Energy=     | 0.232608                    |
| Sum of electronic and zero-point Energies=   | -1592.850290                |
| Sum of electronic and thermal Energies=      | -1592.830905                |
| Sum of electronic and thermal Enthalpies=    | -1592.829961                |
| Sum of electronic and thermal Free Energies= | -1592.897930                |

|       | E (Thermal)<br>KCal/Mol | CV<br>Cal/Mol-Kelvin | S<br>Cal/Mol-Kelvin |
|-------|-------------------------|----------------------|---------------------|
| Total | 188.022                 | 72.289               | 143.052             |
| C     | 0.2244891477            | -2.0803683276        | -0.8099064721       |
| H     | 0.5125354636            | -1.9961561531        | -1.8712500535       |
| H     | 0.7466447762            | -2.9625438366        | -0.3970315783       |
| N     | 0.5758440783            | -0.8814832898        | -0.0587079326       |
| C     | -1.2724099980           | -2.1706238087        | -0.6895098531       |
| H     | -1.8809517500           | -2.1428987365        | -1.5894656101       |
| C     | -1.8487274717           | -2.6721066433        | 0.4858782794        |



|    |                |                |                |
|----|----------------|----------------|----------------|
| C  | 1. 9265059097  | -0. 5407281801 | 0. 0312627582  |
| C  | 2. 3647216753  | 0. 4927461925  | 0. 8833925015  |
| C  | 2. 9015243842  | -1. 2095565117 | -0. 7373481603 |
| C  | 3. 7067233030  | 0. 8476100943  | 0. 9457428279  |
| H  | 1. 6469357824  | 0. 9894387180  | 1. 5307462222  |
| C  | 4. 2432597903  | -0. 8476313944 | -0. 6619721409 |
| H  | 2. 6193561081  | -2. 0217393950 | -1. 4009279595 |
| C  | 4. 6595906380  | 0. 1858125114  | 0. 1727280416  |
| H  | 4. 0100775225  | 1. 6467829113  | 1. 6189884228  |
| H  | 4. 9694983151  | -1. 3852848509 | -1. 2682355771 |
| H  | 5. 7087889253  | 0. 4648527264  | 0. 2271258028  |
| C  | -0. 9683687025 | 2. 9907889710  | -0. 6421742907 |
| H  | -0. 3597470755 | 3. 8018308026  | -1. 0632284643 |
| H  | -1. 9165646032 | 2. 9340288021  | -1. 1844301927 |
| H  | -1. 1735251508 | 3. 1971617716  | 0. 4112719116  |
| C  | 0. 0696896742  | 1. 4274885316  | -2. 1751311376 |
| H  | -0. 8546041383 | 1. 2699313794  | -2. 7398695059 |
| H  | 0. 6159143399  | 2. 2719366127  | -2. 6160170552 |
| H  | 0. 6906940061  | 0. 5286734321  | -2. 2429825539 |
| H  | -1. 2096949475 | -3. 1231804228 | 1. 2458012744  |
| H  | -2. 8750059560 | -3. 0262336578 | 0. 4747745903  |
| O  | -2. 2944140562 | -1. 1631988213 | 1. 5081289928  |
| H  | -1. 9759625321 | -1. 1577630122 | 2. 4214520744  |
| N  | -0. 2670794751 | 1. 6998353148  | -0. 7654877969 |
| H  | 0. 6160948099  | 1. 7876247274  | -0. 2563303009 |
| Ti | -1. 1821032193 | -0. 0974196352 | 0. 2406473267  |
| Cl | -2. 9990523927 | 0. 4155698929  | -1. 0746576290 |
| Cl | -0. 7251941810 | 1. 1394982847  | 2. 1882152383  |

## Product complex

|                                              |                              |
|----------------------------------------------|------------------------------|
| Zero-point correction=                       | 0. 279175 (Hartree/Particle) |
| Thermal correction to Energy=                | 0. 299949                    |
| Thermal correction to Enthalpy=              | 0. 300893                    |
| Thermal correction to Gibbs Free Energy=     | 0. 229957                    |
| Sum of electronic and zero-point Energies=   | -1592. 898338                |
| Sum of electronic and thermal Energies=      | -1592. 877564                |
| Sum of electronic and thermal Enthalpies=    | -1592. 876619                |
| Sum of electronic and thermal Free Energies= | -1592. 947556                |

|       | E (Thermal) | CV             | S              |
|-------|-------------|----------------|----------------|
|       | KCal/Mol    | Cal/Mol-Kelvin | Cal/Mol-Kelvin |
| Total | 188. 221    | 75. 801        | 149. 298       |

|    |               |               |               |
|----|---------------|---------------|---------------|
| C  | -0.4511486597 | 2.4550267487  | -0.4887691453 |
| H  | -1.4386344290 | 2.9345371001  | -0.4209804047 |
| H  | 0.2047481847  | 2.9666867499  | 0.2268417312  |
| N  | -0.6023856378 | 1.0474685518  | -0.0574344404 |
| C  | 0.1046769934  | 2.6058778274  | -1.8719792690 |
| H  | -0.3562895591 | 1.9946354625  | -2.6529880348 |
| C  | 1.1077034068  | 3.4270372152  | -2.1781068027 |
| C  | -1.9183768554 | 0.5386488673  | -0.0806480359 |
| C  | -2.3475163523 | -0.3699015130 | 0.9001579188  |
| C  | -2.8289586116 | 0.9058395386  | -1.0878863662 |
| C  | -3.6228134129 | -0.9251366670 | 0.8475225542  |
| H  | -1.6787222147 | -0.6178292392 | 1.7224806125  |
| C  | -4.1059415889 | 0.3566527858  | -1.1251909956 |
| H  | -2.5338340582 | 1.6098301009  | -1.8630226980 |
| C  | -4.5093915445 | -0.5715893717 | -0.1669889882 |
| H  | -3.9283496491 | -1.6259288570 | 1.6216003948  |
| H  | -4.7877687475 | 0.6516517867  | -1.9197996362 |
| H  | -5.5066409339 | -1.0026711149 | -0.2032652869 |
| C  | 0.8581475311  | -3.0559395545 | -0.5559099328 |
| H  | 0.3040006574  | -3.9260361961 | -0.9328576355 |
| H  | 1.7675632593  | -2.9297879826 | -1.1517016198 |
| H  | 1.1372872165  | -3.2275482072 | 0.4864024279  |
| C  | -0.4353769616 | -1.6757731835 | -2.0496475851 |
| H  | 0.4262230172  | -1.5299538989 | -2.7077356934 |
| H  | -0.9858121123 | -2.5701387731 | -2.3721010518 |
| H  | -1.0933520686 | -0.8055385116 | -2.1292323232 |
| H  | 1.6001138399  | 4.0245854164  | -1.4103110901 |
| H  | 1.4753623346  | 3.5287577809  | -3.1959723737 |
| O  | 1.9734920978  | 1.4388685800  | 0.8599827429  |
| H  | 2.8349270299  | 1.7675251982  | 0.5794919944  |
| N  | 0.0448485302  | -1.8299388040 | -0.6642776331 |
| H  | -0.7800602980 | -1.9616078421 | -0.0732503447 |
| Ti | 0.9872162668  | 0.0548178521  | 0.2900611929  |
| Cl | 2.4885488198  | -0.2492243350 | -1.4531736749 |
| Cl | 0.8875180396  | -1.1256627713 | 2.2282125821  |

## TS of product complex dissociation

|                                            |                             |
|--------------------------------------------|-----------------------------|
| Zero-point correction=                     | 0.314575 (Hartree/Particle) |
| Thermal correction to Energy=              | 0.337693                    |
| Thermal correction to Enthalpy=            | 0.338637                    |
| Thermal correction to Gibbs Free Energy=   | 0.262691                    |
| Sum of electronic and zero-point Energies= | -1669.642025                |
| Sum of electronic and thermal Energies=    | -1669.618906                |

Sum of electronic and thermal Enthalpies= -1669.617962  
 Sum of electronic and thermal Free Energies= -1669.693908

|       | E (Thermal) | CV             | S              |
|-------|-------------|----------------|----------------|
|       | KCal/Mol    | Cal/Mol-Kelvin | Cal/Mol-Kelvin |
| Total | 211.906     | 83.794         | 159.842        |
| C     | -0.16308    | 2.33355        | 0.45004        |
| H     | -1.11764    | 2.81259        | 0.72268        |
| H     | 0.56474     | 2.55458        | 1.24289        |
| N     | -0.3871     | 0.85706        | 0.4341         |
| C     | 0.36812     | 2.88164        | -0.83981       |
| H     | -0.178      | 2.62799        | -1.75253       |
| C     | 1.45428     | 3.64885        | -0.91248       |
| C     | -1.71491    | 0.43864        | 0.1112         |
| C     | -2.20025    | -0.77508       | 0.62397        |
| C     | -2.55591    | 1.19676        | -0.71784       |
| C     | -3.46959    | -1.23517       | 0.28399        |
| H     | -1.57937    | -1.3718        | 1.29456        |
| C     | -3.82736    | 0.73457        | -1.04361       |
| H     | -2.2203     | 2.14603        | -1.12986       |
| C     | -4.28787    | -0.48693       | -0.55782       |
| H     | -3.81916    | -2.18327       | 0.68928        |
| H     | -4.45952    | 1.33681        | -1.69379       |
| H     | -5.27872    | -0.84732       | -0.82593       |
| C     | 1.09858     | -2.81992       | -1.61393       |
| H     | 0.54286     | -3.45695       | -2.31522       |
| H     | 2.03503     | -2.50472       | -2.0862        |
| H     | 1.32924     | -3.39087       | -0.70968       |
| C     | -0.1107     | -0.92956       | -2.50563       |
| H     | 0.78084     | -0.56915       | -3.03003       |
| H     | -0.6586     | -1.61524       | -3.16648       |
| H     | -0.75484    | -0.07619       | -2.26833       |
| H     | 2.03131     | 3.90706        | -0.02254       |
| H     | 1.81175     | 4.04829        | -1.85926       |
| O     | 2.07155     | 0.76871        | 1.54699        |
| H     | 2.96691     | 1.13704        | 1.58934        |
| N     | 0.30578     | -1.61921       | -1.26789       |
| H     | -0.54787    | -1.95635       | -0.81114       |
| Cl    | 2.85483     | 0.01311        | -1.19332       |
| Cl    | 0.9535      | -2.0444        | 1.70008        |
| Ti    | 1.24489     | -0.2792        | 0.33666        |
| H     | -1.57726    | 0.70788        | 3.31156        |
| O     | -0.62424    | 0.5889         | 3.11414        |

|   |          |         |         |
|---|----------|---------|---------|
| H | -0.45411 | 0.65159 | 2.0845  |
| H | -0.10358 | 1.26651 | 3.59379 |

## Allylamine

|                                              |                             |
|----------------------------------------------|-----------------------------|
| Zero-point correction=                       | 0.177851 (Hartree/Particle) |
| Thermal correction to Energy=                | 0.187150                    |
| Thermal correction to Enthalpy=              | 0.188094                    |
| Thermal correction to Gibbs Free Energy=     | 0.142752                    |
| Sum of electronic and zero-point Energies=   | -403.840204                 |
| Sum of electronic and thermal Energies=      | -403.830905                 |
| Sum of electronic and thermal Enthalpies=    | -403.829961                 |
| Sum of electronic and thermal Free Energies= | -403.875304                 |

|       | E (Thermal) | CV             | S              |
|-------|-------------|----------------|----------------|
|       | KCal/Mol    | Cal/Mol-Kelvin | Cal/Mol-Kelvin |
| Total | 117.438     | 35.967         | 95.431         |
| C     | 2.00581     | -0.03497       | -0.83464       |
| H     | 1.7425      | -0.93209       | -1.40973       |
| H     | 2.77531     | 0.48301        | -1.42089       |
| N     | 0.83857     | 0.82712        | -0.76138       |
| C     | 2.55222     | -0.40182       | 0.51258        |
| H     | 1.84616     | -0.86758       | 1.20546        |
| C     | 3.80545     | -0.15936       | 0.8971         |
| C     | -0.40641    | 0.37081        | -0.35161       |
| C     | -1.34881    | 1.29289        | 0.13707        |
| C     | -0.78519    | -0.97786       | -0.44837       |
| C     | -2.62058    | 0.88166        | 0.50793        |
| H     | -1.06771    | 2.34334        | 0.22318        |
| C     | -2.06668    | -1.37592       | -0.07612       |
| H     | -0.08493    | -1.72194       | -0.82051       |
| C     | -2.99537    | -0.45855       | 0.40555        |
| H     | -3.32524    | 1.61782        | 0.89005        |
| H     | -2.33658    | -2.42624       | -0.16275       |
| H     | -3.99058    | -0.77981       | 0.70068        |
| H     | 4.52187     | 0.31295        | 0.22278        |
| H     | 4.16392     | -0.42116       | 1.88993        |
| H     | 1.04264     | 1.78056        | -0.48545       |

## TiCl2O

|                                 |                             |
|---------------------------------|-----------------------------|
| Zero-point correction=          | 0.005535 (Hartree/Particle) |
| Thermal correction to Energy=   | 0.010846                    |
| Thermal correction to Enthalpy= | 0.011790                    |

|                                              |              |
|----------------------------------------------|--------------|
| Thermal correction to Gibbs Free Energy=     | -0.025213    |
| Sum of electronic and zero-point Energies=   | -1054.091331 |
| Sum of electronic and thermal Energies=      | -1054.086020 |
| Sum of electronic and thermal Enthalpies=    | -1054.085076 |
| Sum of electronic and thermal Free Energies= | -1054.122080 |

|       | E (Thermal)<br>KCal/Mol | CV<br>Cal/Mol-Kelvin | S<br>Cal/Mol-Kelvin |
|-------|-------------------------|----------------------|---------------------|
| Total | 6.806                   | 14.707               | 77.881              |
| O     | 1.97057                 | 1.09426              | 1.27752             |
| Cl    | 3.02222                 | -0.71255             | -1.02881            |
| Cl    | 0.97674                 | -1.80336             | 1.82696             |
| Ti    | 1.43217                 | -0.13261             | 0.42251             |

## 2. Reaction of 2-methylallyl alcohol with aniline

### 2-methylallyl alcohol

|                                              |                             |
|----------------------------------------------|-----------------------------|
| Zero-point correction=                       | 0.112608 (Hartree/Particle) |
| Thermal correction to Energy=                | 0.118993                    |
| Thermal correction to Enthalpy=              | 0.119937                    |
| Thermal correction to Gibbs Free Energy=     | 0.083191                    |
| Sum of electronic and zero-point Energies=   | -232.180420                 |
| Sum of electronic and thermal Energies=      | -232.174036                 |
| Sum of electronic and thermal Enthalpies=    | -232.173092                 |
| Sum of electronic and thermal Free Energies= | -232.209838                 |

|       | E (Thermal)<br>KCal/Mol | CV<br>Cal/Mol-Kelvin | S<br>Cal/Mol-Kelvin |
|-------|-------------------------|----------------------|---------------------|
| Total | 74.669                  | 22.032               | 77.339              |
| C     | -1.50684                | -1.00216             | -0.19683            |
| H     | -1.29119                | -2.06921             | -0.19987            |
| H     | -2.5307                 | -0.7033              | -0.4142             |
| C     | -0.55829                | -0.09948             | 0.06717             |
| C     | 0.83052                 | -0.53061             | 0.42878             |
| H     | 0.91804                 | -1.62518             | 0.35296             |
| H     | 1.03072                 | -0.24765             | 1.47736             |
| O     | 1.7566                  | 0.11845              | -0.43237            |
| H     | 2.64969                 | -0.05812             | -0.11789            |
| C     | -0.80712                | 1.37559              | 0.06241             |
| H     | -0.199                  | 1.86917              | -0.70465            |
| H     | -1.86045                | 1.60391              | -0.12808            |

H                                -0.51957    1.82273    1.02408

### TS [3,3]

Zero-point correction=                                0.304561 (Hartree/Particle)  
Thermal correction to Energy=                        0.326766  
Thermal correction to Enthalpy=                     0.327710  
Thermal correction to Gibbs Free Energy=           0.253290  
Sum of electronic and zero-point Energies=        -1632.100636  
Sum of electronic and thermal Energies=           -1632.078431  
Sum of electronic and thermal Enthalpies=         -1632.077486  
Sum of electronic and thermal Free Energies=       -1632.151906

|       | E (Thermal)<br>KCal/Mol | CV<br>Cal/Mol-Kelvin | S<br>Cal/Mol-Kelvin |
|-------|-------------------------|----------------------|---------------------|
| Total | 205.049                 | 80.896               | 156.630             |
| C     | 0.7697600433            | 2.8288184528         | -0.6534134644       |
| C     | 0.0737430037            | 3.4357500847         | 0.3718269335        |
| C     | -1.2836992258           | 3.6339318239         | 0.1581579843        |
| H     | 1.8423402387            | 2.6630176537         | -0.5843469152       |
| H     | 0.3223443221            | 2.7160666699         | -1.6393120983       |
| N     | 0.5337785988            | 0.6244782423         | -0.2257375186       |
| C     | 1.8345043681            | 0.1666563083         | -0.3563851285       |
| C     | 2.6676458618            | 0.0351673673         | 0.7681138707        |
| C     | 2.3349073819            | -0.1820560758        | -1.6234835795       |
| C     | 3.9567773978            | -0.4668771917        | 0.6270205651        |
| H     | 2.2721569549            | 0.3133553134         | 1.7443723137        |
| C     | 3.6260312596            | -0.6834463053        | -1.7530857263       |
| H     | 1.6815170292            | -0.0691789334        | -2.4890744899       |
| C     | 4.4415134869            | -0.8319100932        | -0.6303138457       |
| H     | 4.5890037333            | -0.5766656212        | 1.5058043382        |
| H     | 3.9988615464            | -0.9611225565        | -2.7369470304       |
| H     | -1.9066777029           | 4.1032630993         | 0.9154690857        |
| H     | -1.6873732649           | 3.5836190079         | -0.8502851113       |
| C     | -2.1291366579           | -2.7945829487        | -0.3213670405       |
| H     | -2.3117255445           | -2.9106641238        | 0.7519821947        |
| H     | -2.9613059261           | -2.2451680718        | -0.771934855        |
| H     | -2.0646344818           | -3.7901750137        | -0.7809173471       |
| C     | 0.2611793741            | -2.8120339538        | 0.026107739         |
| H     | 1.2062632161            | -2.3206024059        | -0.221604781        |
| H     | 0.170936742             | -2.8691338651        | 1.1147899226        |
| H     | 0.2679311831            | -3.8292660951        | -0.389499019        |
| N     | -0.8750909666           | -2.0414312089        | -0.5094518487       |

|    |               |               |               |
|----|---------------|---------------|---------------|
| H  | -0.7360724392 | -1.9254139463 | -1.5148279794 |
| O  | -2.0166821311 | 1.735340151   | 0.5881146607  |
| H  | -2.9577053787 | 1.7983535598  | 0.3772568724  |
| Ti | -1.093598879  | 0.1293899803  | 0.122356305   |
| Cl | -2.242937138  | 0.192110987   | -1.9880586802 |
| Cl | -1.0941872783 | -0.7287588226 | 2.2857795766  |
| H  | 5.4498006449  | -1.2252612991 | -0.734619825  |
| C  | 0.660095006   | 3.553169345   | 1.7473291274  |
| H  | 0.3634077601  | 2.6853162192  | 2.3550985292  |
| H  | 1.7545213244  | 3.5745837103  | 1.7154443877  |
| H  | 0.3112369875  | 4.4529156961  | 2.2654243376  |

## TS [ 2+2 ]

|                                              |                             |
|----------------------------------------------|-----------------------------|
| Zero-point correction=                       | 0.308305 (Hartree/Particle) |
| Thermal correction to Energy=                | 0.329460                    |
| Thermal correction to Enthalpy=              | 0.330404                    |
| Thermal correction to Gibbs Free Energy=     | 0.258672                    |
| Sum of electronic and zero-point Energies=   | -1632.099784                |
| Sum of electronic and thermal Energies=      | -1632.078629                |
| Sum of electronic and thermal Enthalpies=    | -1632.077685                |
| Sum of electronic and thermal Free Energies= | -1632.149417                |

|       | E (Thermal)   | CV             | S              |
|-------|---------------|----------------|----------------|
|       | KCal/Mol      | Cal/Mol-Kelvin | Cal/Mol-Kelvin |
| Total | 206.739       | 77.998         | 150.973        |
| C     | 0.2334177403  | -1.6677591446  | -1.2895660177  |
| H     | 0.8791386399  | -1.3288869703  | -2.0992035592  |
| H     | 0.6633854408, | -2.456706741   | -0.6705998179  |
| N     | 0.7956519458  | -0.2762609481  | -0.0582564614  |
| C     | -1.1660539981 | -1.6282710097  | -1.5094324781  |
| C     | 2.1751625549  | -0.2076698987  | -0.0272694025  |
| C     | 2.8465393069  | -0.6161473577  | 1.1382047965   |
| C     | 2.9247104356  | 0.2875891143   | -1.1092711941  |
| C     | 4.2308995236  | -0.5236627891  | 1.2186960278   |
| H     | 2.2543075369  | -0.9916577523  | 1.9705980907   |
| C     | 4.3101057558  | 0.372897771    | -1.0200413821  |
| H     | 2.4109440351  | 0.6066469454   | -2.0153019947  |
| C     | 4.9683786069  | -0.0311831035  | 0.1412279551   |
| H     | 4.7389689137  | -0.8387041261  | 2.127457439    |
| H     | 4.8797619624  | 0.7606471186   | -1.8619138425  |
| C     | -2.0015532812 | -2.5268057591  | -0.641581714   |
| H     | -1.7841031762 | -3.6012038421  | -0.7367040082  |

|    |               |               |               |
|----|---------------|---------------|---------------|
| H  | -3.068930524  | -2.3496895799 | -0.816672592  |
| C  | -0.5688510819 | 2.329768843   | -1.7218961482 |
| H  | -1.5885906319 | 2.1998616025  | -2.0996759358 |
| H  | -0.2260716219 | 3.3466545436  | -1.9561715592 |
| H  | 0.090266486   | 1.6119649085  | -2.2232751675 |
| C  | -1.3603882053 | 3.1101484587  | 0.4349321732  |
| H  | -2.4051194724 | 3.025221066   | 0.1256352006  |
| H  | -1.2989732958 | 2.9375858916  | 1.5122081566  |
| H  | -0.9875412903 | 4.1157739114  | 0.1973980015  |
| O  | -1.6367382384 | -2.0990607829 | 0.6920580624  |
| H  | -2.376614451  | -2.111774224  | 1.3150370342  |
| N  | -0.5659225086 | 2.0874664283  | -0.2694473434 |
| H  | 0.3973082745  | 2.1687940519  | 0.0568793611  |
| Ti | -0.9364485784 | -0.0782875749 | 0.1197847601  |
| Cl | -1.1405836114 | 0.2300405471  | 2.4238937166  |
| Cl | -3.242885161  | 0.5259411817  | -0.4236106292 |
| H  | 6.051490047   | 0.0378425768  | 0.2058504277  |
| C  | -1.7039996748 | -1.2069693194 | -2.8511343646 |
| H  | -1.0705266216 | -0.4383115128 | -3.3126140165 |
| H  | -1.7369446477 | -2.0566496682 | -3.5497003818 |
| H  | -2.7176216544 | -0.7994194161 | -2.7640139726 |

## TS retro-[ 2+2 ]

|                                              |                             |
|----------------------------------------------|-----------------------------|
| Zero-point correction=                       | 0.308397 (Hartree/Particle) |
| Thermal correction to Energy=                | 0.329029                    |
| Thermal correction to Enthalpy=              | 0.329973                    |
| Thermal correction to Gibbs Free Energy=     | 0.259843                    |
| Sum of electronic and zero-point Energies=   | -1632.105622                |
| Sum of electronic and thermal Energies=      | -1632.084990                |
| Sum of electronic and thermal Enthalpies=    | -1632.084045                |
| Sum of electronic and thermal Free Energies= | -1632.154175                |

|       | E (Thermal)  | CV             | S              |
|-------|--------------|----------------|----------------|
|       | KCal/Mol     | Cal/Mol-Kelvin | Cal/Mol-Kelvin |
| Total | 206.469      | 77.653         | 147.601        |
| C     | 0.1710630483 | -2.0374547616  | -0.8471607664  |
| H     | 0.4124346515 | -1.9043960308  | -1.9170942785  |
| H     | 0.7235423441 | -2.9320948664  | -0.5029291533  |
| N     | 0.5335837462 | -0.8715489747  | -0.057495043   |
| C     | -1.32811384  | -2.1597309911  | -0.6866215474  |
| C     | -1.789639316 | -2.6231187773  | 0.5584400503   |
| C     | 1.8867745836 | -0.5398199994  | 0.0330946854   |



|    |               |               |               |
|----|---------------|---------------|---------------|
| C  | 2.3381293999  | 0.4287417839  | 0.9514644463  |
| C  | 2.8482925578  | -1.1532371655 | -0.7959037893 |
| C  | 3.6821677054  | 0.7747617138  | 1.0220042782  |
| H  | 1.6267901474  | 0.8823643781  | 1.6367401312  |
| C  | 4.1921352787  | -0.8006260087 | -0.7122899418 |
| H  | 2.5527027806  | -1.9127105778 | -1.5142968852 |
| C  | 4.6224874642  | 0.1676820563  | 0.1905536012  |
| H  | 3.9971339849  | 1.5226215539  | 1.74698547    |
| H  | 4.9089951083  | -1.2931035931 | -1.3662197284 |
| C  | -0.8740833354 | 3.0402525178  | -0.6353778748 |
| H  | -0.2324047948 | 3.8245262746  | -1.0583036841 |
| H  | -1.8262812336 | 3.0272448207  | -1.1730656377 |
| H  | -1.0647717195 | 3.2527389473  | 0.4194417902  |
| C  | 0.0714902818  | 1.4370635519  | -2.1818061078 |
| H  | -0.8681316783 | 1.3258100385  | -2.7330063671 |
| H  | 0.6507248762  | 2.2564970893  | -2.6278444909 |
| H  | 0.6487403971  | 0.5108596212  | -2.2647581192 |
| H  | -1.0735641167 | -2.939780641  | 1.3168956231  |
| H  | -2.7718169501 | -3.084825028  | 0.6271590514  |
| O  | -2.3553110276 | -1.0938526431 | 1.4931903595  |
| H  | -2.0790383955 | -1.0310179788 | 2.4184336937  |
| N  | -0.2325188965 | 1.7193764048  | -0.7666593633 |
| H  | 0.6603498112  | 1.7676804782  | -0.2688751033 |
| Ti | -1.2105833585 | -0.0510265983 | 0.2384005394  |
| Cl | -3.0110573305 | 0.5525884885  | -1.0442071815 |
| Cl | -0.7677261583 | 1.1895202147  | 2.1867054856  |
| H  | 5.6733874501  | 0.438830439   | 0.2522434522  |
| C  | -2.1443388904 | -2.4164450482 | -1.9283505984 |
| H  | -1.8960540445 | -3.3968544749 | -2.3645098429 |
| H  | -3.2183556114 | -2.4048051582 | -1.7126278052 |
| H  | -1.9601704095 | -1.6594420055 | -2.7012707383 |

## Part II: structures in the reaction of titanium imido iodide

### Starting material

|                                            |                             |
|--------------------------------------------|-----------------------------|
| Zero-point correction=                     | 0.286647 (Hartree/Particle) |
| Thermal correction to Energy=              | 0.307932                    |
| Thermal correction to Enthalpy=            | 0.308876                    |
| Thermal correction to Gibbs Free Energy=   | 0.232293                    |
| Sum of electronic and zero-point Energies= | -637.397524                 |
| Sum of electronic and thermal Energies=    | -637.376239                 |
| Sum of electronic and thermal Enthalpies=  | -637.375295                 |

Sum of electronic and thermal Free Energies= -637.451878

|       | E (Thermal)<br>KCal/Mol | CV<br>Cal/Mol-Kelvin | S<br>Cal/Mol-Kelvin |
|-------|-------------------------|----------------------|---------------------|
| Total | 193.230                 | 73.302               | 161.182             |
| C     | 2.722922122069          | 0.036339689191       | -1.045836731332     |
| C     | 2.086066837590          | -0.003535498073      | 0.208268365859      |
| C     | 2.868429329930          | -0.033940216379      | 1.375371613407      |
| C     | 4.256030837514          | -0.024688467339      | 1.282917262674      |
| C     | 4.883465906167          | 0.014436264576       | 0.037101031907      |
| C     | 4.110449810996          | 0.044919066164       | -1.124562690221     |
| H     | 2.103260915438          | 0.060030252599       | -1.941858694289     |
| H     | 2.367864275038          | -0.064335091446      | 2.341349138267      |
| H     | 4.853704192591          | -0.048313361691      | 2.191797957887      |
| H     | 5.968887367406          | 0.021336708169       | -0.027874773168     |
| H     | 4.593232453982          | 0.075531151412       | -2.099134479471     |
| N     | 0.711205722720          | -0.011588467472      | 0.274746286152      |
| C     | -0.208114063554         | 2.994091987475       | -0.514114752219     |
| H     | -0.331756483757         | 4.065237108625       | -0.303774200521     |
| H     | 0.794288375793          | 2.675425383910       | -0.215505020985     |
| H     | -0.323127378375         | 2.826552760703       | -1.590252627304     |
| C     | -2.578700356381         | 2.702074605029       | -0.063852486527     |
| H     | -2.794339638596         | 2.578743515634       | -1.129966346010     |
| H     | -3.309748946239         | 2.128229978298       | 0.514962882308      |
| H     | -2.666741895643         | 3.764768958227       | 0.197897521513      |
| N     | -1.219362837916         | 2.200268553968       | 0.210942332168      |
| H     | -1.045542067693         | 2.331812549565       | 1.209731043215      |
| N     | -1.208958900258         | -2.222777119648      | 0.045988793034      |
| H     | -1.032289464359         | -2.428020891549      | 1.031716572069      |
| C     | -2.566590119901         | -2.709160576415      | -0.263018635793     |
| H     | -3.299043375338         | -2.182421984199      | 0.357186582195      |
| H     | -2.784530501174         | -2.509096961584      | -1.316981745381     |
| H     | -2.649784770107         | -3.788585612151      | -0.079627806243     |
| Ti    | -0.950132233838         | -0.009070735005      | 0.091025111389      |
| C     | -0.195959430456         | -2.955503400256      | -0.738340694899     |
| H     | -0.315054739853         | -2.709361108478      | -1.798643324723     |
| H     | 0.805714095798          | -2.654478324114      | -0.419751453106     |
| H     | -0.313662481865         | -4.039780220172      | -0.607629576176     |
| I     | -2.130600514399         | -0.104907140021      | 2.617120926385      |
| I     | -1.445152863254         | 0.089285552379       | -2.606993631868     |

**Reaction complex**

|                                              |                             |
|----------------------------------------------|-----------------------------|
| Zero-point correction=                       | 0.279029 (Hartree/Particle) |
| Thermal correction to Energy=                | 0.300575                    |
| Thermal correction to Enthalpy=              | 0.301519                    |
| Thermal correction to Gibbs Free Energy=     | 0.224781                    |
| Sum of electronic and zero-point Energies=   | -695.320886                 |
| Sum of electronic and thermal Energies=      | -695.299340                 |
| Sum of electronic and thermal Enthalpies=    | -695.298396                 |
| Sum of electronic and thermal Free Energies= | -695.375134                 |

|       | E (Thermal)<br>KCal/Mol | CV<br>Cal/Mol-Kelvin | S<br>Cal/Mol-Kelvin |
|-------|-------------------------|----------------------|---------------------|
| Total | 188.614                 | 74.478               | 161.508             |
| C     | -2.373646227100         | -1.128578878275      | -0.996993987138     |
| C     | -1.739927239323         | -0.727664551618      | 0.191853004650      |
| C     | -2.485762924598         | -0.654040134237      | 1.380301773213      |
| C     | -3.839780592050         | -0.966415278186      | 1.372079846977      |
| C     | -4.468582475592         | -1.357519077452      | 0.188549636284      |
| C     | -3.729325011889         | -1.438730722390      | -0.992206360920     |
| H     | -1.783582423573         | -1.175547400493      | -1.912229619695     |
| H     | -1.983468742332         | -0.337819379064      | 2.292866024923      |
| H     | -4.411367653765         | -0.902843988567      | 2.295597300035      |
| H     | -5.528658089323         | -1.599596800173      | 0.187032364525      |
| H     | -4.213911854410         | -1.743748688327      | -1.917368262541     |
| N     | -0.408740929187         | -0.382898615280      | 0.182503038127      |
| C     | 1.370998827582          | -2.842131059639      | -0.835463072975     |
| H     | 1.813035986907          | -3.842180708081      | -0.729774235658     |
| H     | 0.314826777557          | -2.874171762634      | -0.555731359431     |
| H     | 1.448737145651          | -2.525293414486      | -1.880745216917     |
| C     | 3.534186910039          | -1.912287780568      | -0.231596667292     |
| H     | 3.725449374179          | -1.601666176144      | -1.263773516970     |
| H     | 4.048342030471          | -1.225300726818      | 0.448217975297      |
| H     | 3.926788023405          | -2.927007382507      | -0.084064421105     |
| N     | 2.080013608280          | -1.869577679634      | 0.020721238697      |
| H     | 1.933921175485          | -2.161025065215      | 0.989869412817      |
| Ti    | 1.171519378699          | 0.145958907995       | 0.109060270318      |
| C     | 0.014062667160          | 3.172627196120       | -0.438022622813     |
| H     | 0.574043643953          | 3.438566324871       | -1.345791202901     |
| H     | -0.144056252148         | 4.068800699420       | 0.172871589038      |
| O     | 0.837885984676          | 2.255037712819       | 0.333833131776      |
| H     | 1.577372578762          | 2.730882668176       | 0.738936747321      |
| C     | -1.280601872581         | 2.522180036336       | -0.772166315432     |
| H     | -1.238792195434         | 1.685647199723       | -1.471040638908     |
| C     | -2.446539763488         | 2.929361224070       | -0.273208967679     |

|   |                 |                |                 |
|---|-----------------|----------------|-----------------|
| H | -2.507767570709 | 3.760081473336 | 0.429122372845  |
| H | -3.381422104421 | 2.446762030639 | -0.550420405021 |
| I | 2.252912420619  | 0.347772281308 | 2.664040281474  |
| I | 1.762145678418  | 0.549897834883 | -2.542980554545 |

### TS [3,3]

|                                              |                             |
|----------------------------------------------|-----------------------------|
| Zero-point correction=                       | 0.275180 (Hartree/Particle) |
| Thermal correction to Energy=                | 0.296938                    |
| Thermal correction to Enthalpy=              | 0.297882                    |
| Thermal correction to Gibbs Free Energy=     | 0.221387                    |
| Sum of electronic and zero-point Energies=   | -695.281212                 |
| Sum of electronic and thermal Energies=      | -695.259454                 |
| Sum of electronic and thermal Enthalpies=    | -695.258510                 |
| Sum of electronic and thermal Free Energies= | -695.335005                 |

|       | E (Thermal)<br>KCal/Mol | CV<br>Cal/Mol-Kelvin | S<br>Cal/Mol-Kelvin |
|-------|-------------------------|----------------------|---------------------|
| Total | 186.331                 | 76.203               | 160.997             |
| C     | -0.3293516498           | 1.5107667461         | 2.7900864641        |
| C     | -0.4194316021           | 0.3694894641         | 3.5598887844        |
| C     | -1.5184651319           | -0.4513865130        | 3.4174197363        |
| H     | 0.5304497911            | 2.1754514980         | 2.8510797946        |
| H     | 0.4594397414            | 0.0197530197         | 4.1158371968        |
| H     | -1.2138892146           | 1.8974236985         | 2.2810165874        |
| N     | 0.4021641132            | 0.9076964013         | 0.7172279741        |
| C     | 1.1018197743            | 2.0446897461         | 0.3398746746        |
| C     | 2.4894279462            | 2.1297298746         | 0.5389301517        |
| C     | 0.4238713210            | 3.1227197447         | -0.2539764133       |
| C     | 3.1845016743            | 3.2594997413         | 0.1203398763        |
| H     | 3.0024297647            | 1.2873041645         | 0.9994964655        |
| C     | 1.1309036467            | 4.2471379460         | -0.6688931321       |
| H     | -0.6537013465           | 3.0449739874         | -0.3967613486       |
| C     | 2.5115464613            | 4.3201064963         | -0.4875196744       |
| H     | 4.2606565464            | 3.3117906149         | 0.26632978131       |
| H     | 0.5999187412            | 5.0716161318         | -1.13945643234      |
| H     | 3.0600046799            | 5.2001697461         | -0.81511976222      |
| H     | -1.6119037981           | -1.3753679541        | 3.98263049174       |
| H     | -2.4225997467           | -0.0684497461        | 2.94437979643       |
| C     | -0.3608397613           | -1.4188803497        | -2.88593797936      |
| H     | 0.3297996131            | -2.2536179416        | -2.72717974613      |
| H     | -1.3692174936           | -1.7244498763        | -2.58643967464      |
| H     | -0.3691779749           | -1.1573697466        | -3.95244794637      |

|    |               |               |                |
|----|---------------|---------------|----------------|
| C  | 1.3977996310  | 0.2091994637  | -2.53176946315 |
| H  | 1.6941455135  | 1.0995398746  | -1.97168131378 |
| H  | 2.1450213138  | -0.5719313984 | -2.37119746020 |
| H  | 1.3584894613  | 0.4544779411  | -3.60096796346 |
| N  | 0.0800094137  | -0.2714596436 | -2.06706973443 |
| H  | -0.5904997497 | 0.4840564654  | -2.23240646377 |
| O  | -1.0477246419 | -1.4249079641 | 1.62943941461  |
| H  | -1.6634797413 | -2.1653936165 | 1.54361974131  |
| Ti | -0.2536516457 | -0.5823313133 | 0.13879064974  |
| I  | -2.8943519654 | 0.2701467961  | -0.58391654936 |
| I  | 1.8625379841  | -2.3650706548 | 0.06577791101  |

## TS [ 2+2 ]

|                                              |                             |
|----------------------------------------------|-----------------------------|
| Zero-point correction=                       | 0.279681 (Hartree/Particle) |
| Thermal correction to Energy=                | 0.300130                    |
| Thermal correction to Enthalpy=              | 0.301074                    |
| Thermal correction to Gibbs Free Energy=     | 0.227454                    |
| Sum of electronic and zero-point Energies=   | -695.283758                 |
| Sum of electronic and thermal Energies=      | -695.263310                 |
| Sum of electronic and thermal Enthalpies=    | -695.262366                 |
| Sum of electronic and thermal Free Energies= | -695.335986                 |

|       | E (Thermal)<br>KCal/Mol | CV<br>Cal/Mol-Kelvin | S<br>Cal/Mol-Kelvin |
|-------|-------------------------|----------------------|---------------------|
| Total | 188.334                 | 72.756               | 154.948             |
| C     | 0.246037350268          | -1.582048623327      | -1.386426404215     |
| H     | 0.815716607197          | -1.134416326621      | -2.198814730842     |
| H     | 0.753621644301          | -2.402939593450      | -0.876901189407     |
| N     | 0.800637677325          | -0.298170779528      | -0.049710566744     |
| C     | -1.166362010762         | -1.610350643482      | -1.479944285902     |
| H     | -1.662067722711         | -1.166725504464      | -2.341057976640     |
| C     | 2.182220211295          | -0.231880841198      | 0.011658241166      |
| C     | 2.834022323446          | -0.732399472483      | 1.150798671055      |
| C     | 2.939110358662          | 0.357695020090       | -1.014432304957     |
| C     | 4.216040727912          | -0.633164296261      | 1.260198682859      |
| H     | 2.231820404926          | -1.180699917812      | 1.938708038537      |
| C     | 4.322072664018          | 0.446317589549       | -0.896709009010     |
| H     | 2.436037669131          | 0.746126058718       | -1.898880151556     |
| C     | 4.964033478296          | -0.046358049991      | 0.239189876973      |
| H     | 4.713493761579          | -1.016045611604      | 2.148352192052      |
| H     | 4.901479955286          | 0.906442108105       | -1.694019837263     |
| H     | 6.045066096488          | 0.027179834582       | 0.328553745900      |

|    |                 |                 |                 |
|----|-----------------|-----------------|-----------------|
| C  | -1.902297616551 | -2.588355783439 | -0.616840243280 |
| H  | -1.569027321815 | -3.630532465585 | -0.714732709871 |
| H  | -2.983190266197 | -2.523736588629 | -0.775129651608 |
| C  | -0.597741174907 | 2.178782238948  | -1.849696205836 |
| H  | -1.629049514684 | 2.089907342382  | -2.207838622261 |
| H  | -0.194595198732 | 3.152984490702  | -2.156399368304 |
| H  | 0.006516452757  | 1.389707515689  | -2.310795027073 |
| C  | -1.321922221410 | 3.154974554779  | 0.247706793701  |
| H  | -2.370169800179 | 3.115644220262  | -0.058057347361 |
| H  | -1.269746154044 | 3.059940594068  | 1.335116861979  |
| H  | -0.886272124526 | 4.114306505386  | -0.062151502086 |
| O  | -1.563538906662 | -2.131701468666 | 0.720878182853  |
| H  | -2.299475351843 | -2.199675023022 | 1.346287100521  |
| N  | -0.587103165510 | 2.039208605086  | -0.380831892035 |
| H  | 0.383157301194  | 2.116430097469  | -0.072477522542 |
| Ti | -0.922191495581 | -0.104139876326 | 0.120625596297  |
| I  | -3.729166388685 | 0.496722081731  | -0.348878221057 |
| I  | -0.994849119090 | 0.304286908661  | 2.853274106365  |

## [ 2+2 ] intermediate

|                                              |                             |
|----------------------------------------------|-----------------------------|
| Zero-point correction=                       | 0.280907 (Hartree/Particle) |
| Thermal correction to Energy=                | 0.301352                    |
| Thermal correction to Enthalpy=              | 0.302297                    |
| Thermal correction to Gibbs Free Energy=     | 0.229515                    |
| Sum of electronic and zero-point Energies=   | -695.303760                 |
| Sum of electronic and thermal Energies=      | -695.283314                 |
| Sum of electronic and thermal Enthalpies=    | -695.282370                 |
| Sum of electronic and thermal Free Energies= | -695.355151                 |

|       | E (Thermal)<br>KCal/Mol | CV<br>Cal/Mol-Kelvin | S<br>Cal/Mol-Kelvin |
|-------|-------------------------|----------------------|---------------------|
| Total | 189.101                 | 73.414               | 153.181             |
| C     | 0.261551455167          | -1.994988866970      | -0.864399624965     |
| H     | 0.720026840380          | -1.998309496249      | -1.867120003555     |
| H     | 0.591195575647          | -2.908710693283      | -0.336703088129     |
| C     | -1.244022795573         | -1.862222198226      | -0.957416295736     |
| H     | -1.654300056653         | -1.790178810132      | -1.965324564233     |
| C     | 2.018406485654          | -0.486710159154      | 0.009497101027      |
| C     | 2.418188133769          | 0.614013217392       | 0.795189773972      |
| C     | 3.020467688884          | -1.234501934538      | -0.639812341404     |
| C     | 3.758330696371          | 0.964033166871       | 0.901282859598      |

|    |                 |                 |                 |
|----|-----------------|-----------------|-----------------|
| H  | 1.670705170083  | 1.161891399330  | 1.368826208238  |
| C  | 4.359457946977  | -0.876362482425 | -0.520133230781 |
| H  | 2.758097010801  | -2.105599166186 | -1.233589863556 |
| C  | 4.740392535034  | 0.226642118845  | 0.240573572662  |
| H  | 4.037605016238  | 1.815025288951  | 1.518919201014  |
| H  | 5.113973489533  | -1.471698274823 | -1.030182496288 |
| H  | 5.788686037110  | 0.500609893734  | 0.328635503177  |
| C  | -0.166378332810 | 1.492705786336  | -2.270476554538 |
| H  | -1.170713695013 | 1.439779181906  | -2.703471519095 |
| H  | 0.389465626867  | 2.305200089564  | -2.756131405631 |
| H  | 0.357654548567  | 0.547888347957  | -2.451825130449 |
| C  | -0.851586453520 | 3.073719065921  | -0.555521296641 |
| H  | -0.248445506332 | 3.847204111708  | -1.048407896800 |
| H  | -1.872722281817 | 3.107660611073  | -0.944435909168 |
| H  | -0.878835153733 | 3.260785218133  | 0.521472844633  |
| C  | -2.059546791452 | -2.624268440402 | 0.033554033241  |
| H  | -1.735423536480 | -3.654674997016 | 0.245414118625  |
| H  | -3.123733346293 | -2.618962030355 | -0.227888394792 |
| N  | 0.671481564642  | -0.799091088937 | -0.111905570692 |
| O  | -1.844427896013 | -1.826633233531 | 1.233403717238  |
| H  | -2.594088530241 | -1.807209063220 | 1.843769379943  |
| N  | -0.279623241706 | 1.736725480952  | -0.816204681117 |
| H  | 0.677513169150  | 1.750041764568  | -0.450320228123 |
| Ti | -1.075253585182 | -0.064450678381 | 0.162014822977  |
| I  | -3.609088697234 | 0.639067916754  | -0.727022077742 |
| I  | -1.017939860851 | 0.925445323718  | 2.714738147053  |

## TS retro-[ 2+2 ]

|                                              |             |                    |
|----------------------------------------------|-------------|--------------------|
| Zero-point correction=                       | 0.278658    | (Hartree/Particle) |
| Thermal correction to Energy=                | 0.298884    |                    |
| Thermal correction to Enthalpy=              | 0.299829    |                    |
| Thermal correction to Gibbs Free Energy=     | 0.227673    |                    |
| Sum of electronic and zero-point Energies=   | -695.282666 |                    |
| Sum of electronic and thermal Energies=      | -695.262440 |                    |
| Sum of electronic and thermal Enthalpies=    | -695.261495 |                    |
| Sum of electronic and thermal Free Energies= | -695.333652 |                    |

|       | E (Thermal)    | CV              | S               |
|-------|----------------|-----------------|-----------------|
|       | KCal/Mol       | Cal/Mol-Kelvin  | Cal/Mol-Kelvin  |
| Total | 187.553        | 73.323          | 151.865         |
| C     | 0.244724430676 | -2.037561302578 | -0.813582764016 |
| H     | 0.592832918046 | -1.939248738291 | -1.854922950408 |

|    |                 |                 |                 |
|----|-----------------|-----------------|-----------------|
| H  | 0.716107996691  | -2.943291545918 | -0.392172856481 |
| N  | 0.593312012254  | -0.861538895794 | -0.019333556452 |
| C  | -1.256294214030 | -2.089072894428 | -0.766139275565 |
| H  | -1.827211499698 | -1.967087070690 | -1.683080229069 |
| C  | -1.886071482071 | -2.671234165605 | 0.342013215174  |
| C  | 1.946843624113  | -0.525746940754 | 0.071129569850  |
| C  | 2.383113725253  | 0.534645501905  | 0.888458982620  |
| C  | 2.924600071767  | -1.222772832211 | -0.669218453092 |
| C  | 3.725120298747  | 0.888593326322  | 0.949013164386  |
| H  | 1.667015333035  | 1.059747175594  | 1.515729680923  |
| C  | 4.266249309205  | -0.861213774853 | -0.597641257505 |
| H  | 2.646076658420  | -2.057800991542 | -1.304905469816 |
| C  | 4.680560809994  | 0.198057830845  | 0.204982876737  |
| H  | 4.025584692752  | 1.709495915173  | 1.596704705554  |
| H  | 4.994773026893  | -1.420746238452 | -1.180750193284 |
| H  | 5.730213432537  | 0.475798766076  | 0.256756447755  |
| C  | -0.918208836704 | 3.025149136964  | -0.723722725461 |
| H  | -0.258958964227 | 3.763883762357  | -1.197828948109 |
| H  | -1.873923996361 | 3.001053487323  | -1.254776699656 |
| H  | -1.098701663056 | 3.308240798432  | 0.315946913763  |
| C  | -0.020267487793 | 1.326185507402  | -2.186333461044 |
| H  | -0.966253596988 | 1.154025011730  | -2.710895736871 |
| H  | 0.519962890765  | 2.138876595937  | -2.689113756282 |
| H  | 0.589104885605  | 0.419230980699  | -2.232877077947 |
| H  | -1.301882022640 | -3.261195753015 | 1.048275860440  |
| H  | -2.944680990116 | -2.910131253309 | 0.292753028022  |
| O  | -2.157216635413 | -1.259514034324 | 1.571589170265  |
| H  | -1.780924259505 | -1.402277460373 | 2.450714160434  |
| N  | -0.302906606783 | 1.683387642520  | -0.778879593723 |
| H  | 0.604488579402  | 1.758405970926  | -0.309643007967 |
| Ti | -1.169359107387 | -0.104815661252 | 0.304921616853  |
| I  | -3.519847829795 | 0.538326763784  | -0.953873433645 |
| I  | -0.840228933582 | 1.451829050246  | 2.606412333535  |

## Product complex

|                                              |                             |
|----------------------------------------------|-----------------------------|
| Zero-point correction=                       | 0.277184 (Hartree/Particle) |
| Thermal correction to Energy=                | 0.299213                    |
| Thermal correction to Enthalpy=              | 0.300157                    |
| Thermal correction to Gibbs Free Energy=     | 0.222561                    |
| Sum of electronic and zero-point Energies=   | -695.335472                 |
| Sum of electronic and thermal Energies=      | -695.313442                 |
| Sum of electronic and thermal Enthalpies=    | -695.312498                 |
| Sum of electronic and thermal Free Energies= | -695.390094                 |



|       | E (Thermal)    | CV             | S              |
|-------|----------------|----------------|----------------|
|       | KCal/Mol       | Cal/Mol-Kelvin | Cal/Mol-Kelvin |
| Total | 187. 759       | 76. 966        | 163. 314       |
| C     | 0. 5620789413  | 1. 4976197946  | 2. 3562179613  |
| H     | 0. 0775013456  | 2. 4246597461  | 2. 6966397644  |
| H     | 0. 3418479417  | 0. 7206597413  | 3. 0991797431  |
| N     | -0. 0844703198 | 1. 1148506949  | 1. 0783594614  |
| C     | 2. 0440879416  | 1. 6950306402  | 2. 2597784136  |
| H     | 2. 4040574612  | 2. 3209398763  | 1. 4422397615  |
| C     | 2. 9157597425  | 1. 1585897436  | 3. 1113974631  |
| C     | -0. 7695297641 | 2. 1511406499  | 0. 3895574600  |
| C     | -2. 1106697461 | 1. 9848274633  | 0. 0224997314  |
| C     | -0. 1200374613 | 3. 3525465987  | 0. 0669937982  |
| C     | -2. 7748294136 | 2. 9794946355  | -0. 6920064619 |
| H     | -2. 6339579657 | 1. 0773993166  | 0. 3202413160  |
| C     | -0. 7941479841 | 4. 3473034602  | -0. 6305897463 |
| H     | 0. 9208796416  | 3. 4992087465  | 0. 3492366777  |
| C     | -2. 1203564145 | 4. 1617145614  | -1. 0261096439 |
| H     | -3. 8158439416 | 2. 8301265252  | -0. 9716064947 |
| H     | -0. 2766064691 | 5. 2715749698  | -0. 8769835787 |
| H     | -2. 6403064673 | 4. 9400298466  | -1. 5785067482 |
| C     | -0. 4825036486 | -1. 5505064671 | -2. 6579497466 |
| H     | -0. 9259684134 | -1. 3780642650 | -3. 6470603641 |
| H     | 0. 5663064681  | -1. 8373813649 | -2. 7806274634 |
| H     | -1. 0214394137 | -2. 3591494131 | -2. 1566697413 |
| C     | -0. 0114994136 | 0. 8165623360  | -2. 6295597641 |
| H     | 1. 0183397461  | 0. 5906112146  | -2. 9184997423 |
| H     | -0. 6174591346 | 0. 9675397167  | -3. 5328946180 |
| H     | -0. 0131665149 | 1. 7370984152  | -2. 0381332561 |
| H     | 2. 5882472972  | 0. 5035898748  | 3. 9182484108  |
| H     | 3. 9835141313  | 1. 3450097467  | 3. 0271498417  |
| O     | 0. 7820094691  | -1. 4405294135 | 1. 7193334968  |
| H     | 1. 3971064657  | -2. 1404906460 | 1. 9644394137  |
| N     | -0. 5474979619 | -0. 3173497374 | -1. 8411203181 |
| H     | -1. 5417861349 | -0. 1251700216 | -1. 6916198746 |
| Ti    | 0. 1214279611  | -0. 5806296414 | 0. 3272706549  |
| I     | 2. 6564675137  | -0. 7056054004 | -0. 8196604883 |
| I     | -2. 3233574581 | -1. 8838171675 | 0. 5618901969  |

### Part III: structures in the reaction of $\text{PhN}=\text{Ti}(\text{NMe}_2)_2(\text{HNMe}_2)_2$

## Starting material

|                                              |                             |
|----------------------------------------------|-----------------------------|
| Zero-point correction=                       | 0.438022 (Hartree/Particle) |
| Thermal correction to Energy=                | 0.464347                    |
| Thermal correction to Enthalpy=              | 0.465291                    |
| Thermal correction to Gibbs Free Energy=     | 0.383297                    |
| Sum of electronic and zero-point Energies=   | -941.254251                 |
| Sum of electronic and thermal Energies=      | -941.227926                 |
| Sum of electronic and thermal Enthalpies=    | -941.226981                 |
| Sum of electronic and thermal Free Energies= | -941.308975                 |

|       | E (Thermal) |          | CV             | S              |
|-------|-------------|----------|----------------|----------------|
|       | KCal/Mol    |          | Cal/Mol-Kelvin | Cal/Mol-Kelvin |
| Total | 291.382     |          | 98.098         | 172.570        |
| C     | 3.05304     | -0.10377 | -1.07001       |                |
| C     | 2.31994     | 0.00162  | 0.13556        |                |
| C     | 3.06775     | 0.08322  | 1.33362        |                |
| C     | 4.45505     | 0.04986  | 1.32319        |                |
| C     | 5.15717     | -0.06452 | 0.1238         |                |
| C     | 4.44102     | -0.13904 | -1.06984       |                |
| H     | 2.49919     | -0.16361 | -2.00788       |                |
| H     | 2.52295     | 0.17409  | 2.274          |                |
| H     | 4.99799     | 0.1133   | 2.26636        |                |
| H     | 6.24533     | -0.09349 | 0.11977        |                |
| H     | 4.97267     | -0.22588 | -2.01763       |                |
| N     | 0.95652     | 0.02073  | 0.14524        |                |
| C     | -0.06154    | 3.03572  | -0.58705       |                |
| H     | -0.0174     | 4.11085  | -0.34847       |                |
| H     | 0.95377     | 2.62826  | -0.64186       |                |
| H     | -0.54049    | 2.91239  | -1.56586       |                |
| C     | -2.17905    | 2.85968  | 0.55236        |                |
| H     | -2.74414    | 2.66948  | -0.36999       |                |
| H     | -2.69588    | 2.38062  | 1.39002        |                |
| H     | -2.15187    | 3.94781  | 0.72574        |                |
| N     | -0.83802    | 2.29269  | 0.40842        |                |
| H     | -0.35849    | 2.35201  | 1.30727        |                |
| N     | -0.82008    | -2.23009 | -0.17164       |                |
| H     | -0.2286     | -2.48979 | 0.6201         |                |
| C     | -2.1244     | -2.87331 | -0.00864       |                |
| H     | -2.55366    | -2.59825 | 0.96084        |                |
| H     | -2.79591    | -2.52238 | -0.80386       |                |
| H     | -2.05482    | -3.971   | -0.07628       |                |
| Ti    | -0.77086    | 0.04153  | 0.08227        |                |

|   |          |          |          |
|---|----------|----------|----------|
| C | -0.16451 | -2.67519 | -1.4042  |
| H | -0.75387 | -2.32337 | -2.2606  |
| H | 0.83499  | -2.23223 | -1.46583 |
| H | -0.08576 | -3.7738  | -1.45259 |
| N | -1.56994 | -0.23643 | 1.8683   |
| N | -1.53081 | 0.26138  | -1.72065 |
| C | -0.88866 | -0.74892 | 3.02984  |
| H | -1.11289 | -0.15826 | 3.94103  |
| H | -1.18726 | -1.79522 | 3.26174  |
| H | 0.19779  | -0.73593 | 2.88043  |
| C | -2.98949 | -0.19359 | 2.10827  |
| H | -3.40078 | -1.17942 | 2.41539  |
| H | -3.26057 | 0.51614  | 2.91708  |
| H | -3.54657 | 0.11836  | 1.20938  |
| C | -2.93668 | 0.07049  | -1.96361 |
| H | -3.41304 | 0.95884  | -2.42775 |
| H | -3.13345 | -0.78307 | -2.64758 |
| H | -3.4886  | -0.13395 | -1.03028 |
| C | -0.84365 | 0.51108  | -2.96008 |
| H | -0.96793 | -0.32257 | -3.68372 |
| H | -1.2262  | 1.41939  | -3.47202 |
| H | 0.23295  | 0.64893  | -2.79385 |

## Reaction complex

|                                              |                             |
|----------------------------------------------|-----------------------------|
| Zero-point correction=                       | 0.437554 (Hartree/Particle) |
| Thermal correction to Energy=                | 0.465075                    |
| Thermal correction to Enthalpy=              | 0.466019                    |
| Thermal correction to Gibbs Free Energy=     | 0.380408                    |
| Sum of electronic and zero-point Energies=   | -941.223984                 |
| Sum of electronic and thermal Energies=      | -941.196463                 |
| Sum of electronic and thermal Enthalpies=    | -941.195519                 |
| Sum of electronic and thermal Free Energies= | -941.281131                 |

|       | E (Thermal) | CV             | S              |
|-------|-------------|----------------|----------------|
|       | KCal/Mol    | Cal/Mol-Kelvin | Cal/Mol-Kelvin |
| Total | 291.839     | 100.023        | 180.184        |
| C     | -2.70132    | -1.05856       | -1.08781       |
| C     | -2.00092    | -0.83615       | 0.1197         |
| C     | -2.76333    | -0.77223       | 1.30913        |
| C     | -4.14439    | -0.9094        | 1.28608        |
| C     | -4.81919    | -1.12333       | 0.08296        |
| C     | -4.08376    | -1.19715       | -1.10057       |

|    |          |          |          |
|----|----------|----------|----------|
| H  | -2.12928 | -1.10889 | -2.01692 |
| H  | -2.23362 | -0.59098 | 2.24649  |
| H  | -4.70497 | -0.8481  | 2.22049  |
| H  | -5.90268 | -1.23019 | 0.06854  |
| H  | -4.59518 | -1.36217 | -2.04992 |
| N  | -0.64972 | -0.64968 | 0.13984  |
| C  | 1.11221  | -2.59023 | -1.71015 |
| H  | 1.56675  | -3.54636 | -2.0163  |
| H  | 0.07075  | -2.74849 | -1.41464 |
| H  | 1.13005  | -1.90357 | -2.56545 |
| C  | 3.26623  | -1.8337  | -0.92151 |
| H  | 3.36255  | -1.13338 | -1.76116 |
| H  | 3.80076  | -1.42304 | -0.05708 |
| H  | 3.72347  | -2.795   | -1.20498 |
| N  | 1.84479  | -1.9756  | -0.59933 |
| H  | 1.75656  | -2.57717 | 0.22161  |
| Ti | 0.96613  | -0.05797 | 0.16558  |
| C  | -0.11949 | 3.032    | 0.32644  |
| H  | 0.60114  | 3.38915  | -0.42475 |
| H  | -0.33431 | 3.84603  | 1.03167  |
| O  | 0.46978  | 1.93754  | 1.05153  |
| H  | 1.1227   | 2.25531  | 1.69482  |
| C  | -1.37426 | 2.55307  | -0.31853 |
| H  | -1.25631 | 1.77268  | -1.07207 |
| C  | -2.5842  | 3.00184  | 0.00657  |
| H  | -2.72614 | 3.76691  | 0.77112  |
| H  | -3.483   | 2.61661  | -0.47382 |
| N  | 1.45634  | 0.87855  | -1.48717 |
| N  | 1.91338  | -0.36336 | 1.86951  |
| C  | 0.82293  | 0.86234  | -2.77945 |
| H  | 0.5478   | 1.88329  | -3.12554 |
| H  | 1.488    | 0.43931  | -3.56395 |
| H  | -0.09426 | 0.25835  | -2.75712 |
| C  | 2.63366  | 1.70862  | -1.51754 |
| H  | 3.40975  | 1.32456  | -2.20979 |
| H  | 2.40792  | 2.74324  | -1.84867 |
| H  | 3.10124  | 1.78531  | -0.52275 |
| C  | 3.1914   | 0.2301   | 2.17253  |
| H  | 3.16657  | 0.85324  | 3.09272  |
| H  | 3.98588  | -0.52742 | 2.33548  |
| H  | 3.54063  | 0.87926  | 1.35099  |
| C  | 1.4934   | -1.23762 | 2.93558  |
| H  | 2.19775  | -2.08629 | 3.07943  |
| H  | 1.43967  | -0.712   | 3.91103  |

H 0.4993 -1.65215 2.7251

### TS [3,3]

Zero-point correction= 0.437901 (Hartree/Particle)  
Thermal correction to Energy= 0.462880  
Thermal correction to Enthalpy= 0.463824  
Thermal correction to Gibbs Free Energy= 0.385203  
Sum of electronic and zero-point Energies= -941.172630  
Sum of electronic and thermal Energies= -941.147651  
Sum of electronic and thermal Enthalpies= -941.146707  
Sum of electronic and thermal Free Energies= -941.225328

|       | E (Thermal) | CV             | S              |
|-------|-------------|----------------|----------------|
|       | KCal/Mol    | Cal/Mol-Kelvin | Cal/Mol-Kelvin |
| Total | 290.462     | 95.109         | 165.473        |
| C     | 0.6282      | 2.65688        | -0.24807       |
| C     | -0.11661    | 3.19131        | 0.86044        |
| C     | -1.46174    | 3.16537        | 0.84032        |
| H     | 1.69641     | 2.93508        | -0.26391       |
| H     | 0.41603     | 3.41819        | 1.78432        |
| H     | 0.13019     | 2.67156        | -1.22695       |
| N     | 0.74575     | 0.80843        | 0.06248        |
| C     | 2.08416     | 0.44478        | 0.11077        |
| C     | 2.54063     | -0.56882       | 0.97096        |
| C     | 3.02674     | 1.02113        | -0.7683        |
| C     | 3.87173     | -0.96545       | 0.97754        |
| H     | 1.80476     | -1.06681       | 1.60069        |
| C     | 4.35794     | 0.62627        | -0.7539        |
| H     | 2.68163     | 1.77408        | -1.47982       |
| C     | 4.79504     | -0.36389       | 0.12544        |
| H     | 4.19106     | -1.75527       | 1.65682        |
| H     | 5.06107     | 1.08903        | -1.44616       |
| H     | 5.8392      | -0.67079       | 0.13626        |
| H     | -2.06637    | 3.5085         | 1.67246        |
| H     | -1.99153    | 2.97721        | -0.09261       |
| C     | -1.26132    | -2.70299       | -1.63727       |
| H     | -1.32106    | -3.3597        | -0.76159       |
| H     | -2.22422    | -2.20214       | -1.78806       |
| H     | -1.02876    | -3.32111       | -2.5192        |
| C     | 1.07647     | -2.3671        | -1.28232       |
| H     | 1.8862      | -1.63341       | -1.25816       |
| H     | 1.0977      | -2.93942       | -0.34593       |

|    |          |          |          |
|----|----------|----------|----------|
| H  | 1.24557  | -3.05914 | -2.12341 |
| N  | -0.22279 | -1.69758 | -1.39533 |
| H  | -0.19599 | -1.08742 | -2.21331 |
| O  | -1.87908 | 1.09876  | 1.33179  |
| H  | -2.82457 | 1.09591  | 1.51581  |
| Ti | -0.92073 | -0.06117 | 0.19391  |
| N  | -2.07807 | 0.30554  | -1.34176 |
| N  | -1.16315 | -1.5843  | 1.43559  |
| C  | -0.89783 | -1.32319 | 2.84332  |
| H  | -1.05491 | -2.24015 | 3.43752  |
| H  | 0.12829  | -0.98798 | 3.04237  |
| H  | -1.57526 | -0.54658 | 3.24517  |
| C  | -2.51456 | -2.11804 | 1.37839  |
| H  | -2.59425 | -3.06515 | 1.94088  |
| H  | -3.26073 | -1.42609 | 1.82537  |
| H  | -2.83166 | -2.32702 | 0.34896  |
| C  | -3.47115 | 0.63521  | -1.15143 |
| H  | -3.64254 | 1.72907  | -1.14924 |
| H  | -4.11225 | 0.20474  | -1.94257 |
| H  | -3.85064 | 0.22973  | -0.2032  |
| C  | -1.52263 | 1.02097  | -2.47528 |
| H  | -0.45418 | 1.23399  | -2.32205 |
| H  | -1.60752 | 0.4516   | -3.42128 |
| H  | -2.03558 | 1.98583  | -2.63988 |

## TS [ 2+2 ]

|                                              |                             |
|----------------------------------------------|-----------------------------|
| Zero-point correction=                       | 0.435858 (Hartree/Particle) |
| Thermal correction to Energy=                | 0.460863                    |
| Thermal correction to Enthalpy=              | 0.461807                    |
| Thermal correction to Gibbs Free Energy=     | 0.383691                    |
| Sum of electronic and zero-point Energies=   | -941.176351                 |
| Sum of electronic and thermal Energies=      | -941.151346                 |
| Sum of electronic and thermal Enthalpies=    | -941.150402                 |
| Sum of electronic and thermal Free Energies= | -941.228518                 |

|       | E (Thermal) | CV             | S              |
|-------|-------------|----------------|----------------|
|       | KCal/Mol    | Cal/Mol-Kelvin | Cal/Mol-Kelvin |
| Total | 289.196     | 95.517         | 164.409        |
| C     | 0.71338     | -0.86013       | -1.89329       |
| H     | 1.22706     | -0.06377       | -2.4365        |
| H     | 1.34761     | -1.7313        | -1.69543       |
| N     | 1.0556      | -0.14213       | -0.1298        |

|    |          |          |          |
|----|----------|----------|----------|
| C  | -0.65561 | -1.07387 | -2.11289 |
| H  | -1.2412  | -0.41099 | -2.74845 |
| C  | 2.42182  | -0.06579 | -0.05426 |
| C  | 3.17657  | -1.18523 | 0.36275  |
| C  | 3.12906  | 1.10621  | -0.40003 |
| C  | 4.56229  | -1.12156 | 0.45549  |
| H  | 2.63922  | -2.09857 | 0.62587  |
| C  | 4.5158   | 1.16205  | -0.30445 |
| H  | 2.5657   | 1.97859  | -0.73716 |
| C  | 5.24348  | 0.0515   | 0.12551  |
| H  | 5.11877  | -1.99779 | 0.78884  |
| H  | 5.0358   | 2.08327  | -0.56841 |
| H  | 6.3287   | 0.09947  | 0.20094  |
| C  | -1.23904 | -2.35249 | -1.62485 |
| H  | -0.73517 | -3.25937 | -1.99627 |
| H  | -2.31157 | -2.42296 | -1.84462 |
| C  | -0.3434  | 2.65057  | -1.50963 |
| H  | -1.21874 | 2.59393  | -2.16682 |
| H  | -0.03507 | 3.7054   | -1.43954 |
| H  | 0.47211  | 2.07014  | -1.95513 |
| C  | -1.72199 | 2.90312  | 0.46983  |
| H  | -2.67807 | 2.76747  | -0.0461  |
| H  | -1.83548 | 2.56116  | 1.50275  |
| H  | -1.46029 | 3.97303  | 0.46466  |
| O  | -1.03723 | -2.34776 | -0.16905 |
| H  | -1.80024 | -2.73579 | 0.28707  |
| N  | -0.68191 | 2.1039   | -0.19021 |
| H  | 0.16137  | 2.16428  | 0.3843   |
| Ti | -0.76574 | -0.14527 | 0.04494  |
| N  | -0.88691 | -0.10007 | 1.98626  |
| N  | -2.80206 | -0.04298 | -0.22704 |
| C  | 0.23355  | -0.45606 | 2.83796  |
| H  | 0.41355  | 0.32514  | 3.60074  |
| H  | 0.0387   | -1.3966  | 3.38804  |
| H  | 1.14994  | -0.58721 | 2.25392  |
| C  | -2.0442  | 0.14908  | 2.8193   |
| H  | -2.35848 | -0.75347 | 3.3799   |
| H  | -1.81143 | 0.92086  | 3.57828  |
| H  | -2.89139 | 0.50249  | 2.22203  |
| C  | -3.70543 | -1.00835 | 0.34121  |
| H  | -3.28568 | -1.49393 | 1.2345   |
| H  | -4.66589 | -0.55002 | 0.658    |
| H  | -3.98466 | -1.81093 | -0.38236 |
| C  | -3.44236 | 0.54684  | -1.37052 |

|   |          |          |          |
|---|----------|----------|----------|
| H | -3.7186  | -0.21099 | -2.13947 |
| H | -4.38496 | 1.07097  | -1.10474 |
| H | -2.79414 | 1.27902  | -1.8722  |

### [ 2+2 ] intermediate

|                                              |                             |
|----------------------------------------------|-----------------------------|
| Zero-point correction=                       | 0.441964 (Hartree/Particle) |
| Thermal correction to Energy=                | 0.467300                    |
| Thermal correction to Enthalpy=              | 0.468244                    |
| Thermal correction to Gibbs Free Energy=     | 0.389177                    |
| Sum of electronic and zero-point Energies=   | -941.208615                 |
| Sum of electronic and thermal Energies=      | -941.183279                 |
| Sum of electronic and thermal Enthalpies=    | -941.182335                 |
| Sum of electronic and thermal Free Energies= | -941.261403                 |

|       | E (Thermal) | CV             | S              |
|-------|-------------|----------------|----------------|
|       | KCal/Mol    | Cal/Mol-Kelvin | Cal/Mol-Kelvin |
| Total | 293.235     | 96.424         | 166.412        |
| C     | 0.74522     | 2.24161        | 0.1477         |
| H     | 1.22454     | 2.51065        | 1.11017        |
| H     | 1.1512      | 2.94872        | -0.60982       |
| C     | -0.75903    | 2.2821         | 0.28779        |
| H     | -1.11246    | 2.69413        | 1.23683        |
| C     | 2.32742     | 0.42008        | -0.20916       |
| C     | 2.64684     | -0.87753       | -0.6789        |
| C     | 3.40725     | 1.20277        | 0.26424        |
| C     | 3.94298     | -1.36998       | -0.63941       |
| H     | 1.85678     | -1.47358       | -1.13504       |
| C     | 4.70256     | 0.6989         | 0.29308        |
| H     | 3.23158     | 2.22029        | 0.60617        |
| C     | 4.98891     | -0.59122       | -0.14468       |
| H     | 4.14131     | -2.37258       | -1.01883       |
| H     | 5.50591     | 1.33499        | 0.66562        |
| H     | 6.00642     | -0.97638       | -0.11788       |
| C     | 0.37743     | -0.36389       | 2.6171         |
| H     | -0.53719    | 0.11299        | 2.99004        |
| H     | 0.80757     | -0.97367       | 3.42507        |
| H     | 1.09748     | 0.40743        | 2.32709        |
| C     | -0.74526    | -2.36075       | 1.87754        |
| H     | -0.19171    | -2.96836       | 2.60874        |
| H     | -1.67148    | -2.00012       | 2.33732        |
| H     | -1.00878    | -2.98529       | 1.01784        |
| C     | -1.52457    | 2.75115        | -0.89563       |



|    |          |          |          |
|----|----------|----------|----------|
| H  | -1.13306 | 3.6459   | -1.41594 |
| H  | -2.58243 | 2.92183  | -0.64187 |
| N  | 1.02624  | 0.85631  | -0.22106 |
| O  | -1.41916 | 1.62416  | -1.80331 |
| H  | -2.15238 | 1.60107  | -2.43433 |
| N  | 0.04288  | -1.19712 | 1.44913  |
| H  | 0.93367  | -1.51978 | 1.0563   |
| Ti | -0.86686 | 0.12095  | -0.11857 |
| N  | -1.24179 | -1.1604  | -1.52662 |
| N  | -2.59119 | 0.01106  | 0.82203  |
| C  | -2.18089 | -1.06563 | -2.61878 |
| H  | -1.68718 | -0.90428 | -3.59474 |
| H  | -2.77096 | -1.99731 | -2.70844 |
| H  | -2.90692 | -0.25881 | -2.45589 |
| C  | -0.5675  | -2.43695 | -1.59312 |
| H  | -1.28766 | -3.27612 | -1.51059 |
| H  | -0.02205 | -2.57149 | -2.54631 |
| H  | 0.16472  | -2.55982 | -0.78534 |
| C  | -3.60229 | -0.98146 | 0.50375  |
| H  | -3.86878 | -1.59027 | 1.3916   |
| H  | -4.54383 | -0.50559 | 0.16636  |
| H  | -3.26083 | -1.66415 | -0.28157 |
| C  | -3.07973 | 0.78312  | 1.94114  |
| H  | -2.36672 | 1.55353  | 2.25018  |
| H  | -4.0359  | 1.28831  | 1.70015  |
| H  | -3.28577 | 0.14072  | 2.82188  |

## TS retro-[ 2+2 ]

|                                              |                             |
|----------------------------------------------|-----------------------------|
| Zero-point correction=                       | 0.440242 (Hartree/Particle) |
| Thermal correction to Energy=                | 0.465197                    |
| Thermal correction to Enthalpy=              | 0.466141                    |
| Thermal correction to Gibbs Free Energy=     | 0.388702                    |
| Sum of electronic and zero-point Energies=   | -941.205738                 |
| Sum of electronic and thermal Energies=      | -941.180784                 |
| Sum of electronic and thermal Enthalpies=    | -941.179840                 |
| Sum of electronic and thermal Free Energies= | -941.257279                 |

|       | E (Thermal) | CV             | S              |
|-------|-------------|----------------|----------------|
|       | KCal/Mol    | Cal/Mol-Kelvin | Cal/Mol-Kelvin |
| Total | 291.915     | 96.012         | 162.985        |
| C     | -0.61899    | -2.26691       | -0.29299       |
| H     | -1.07318    | -2.71968       | 0.61045        |

|    |          |          |          |
|----|----------|----------|----------|
| H  | -1.04099 | -2.81789 | -1.15922 |
| N  | -0.9007  | -0.84101 | -0.38396 |
| C  | 0.88059  | -2.36118 | -0.24276 |
| H  | 1.37763  | -2.60941 | 0.69595  |
| C  | 1.61801  | -2.38472 | -1.43017 |
| C  | -2.20727 | -0.42586 | -0.23122 |
| C  | -2.52785 | 0.95238  | -0.16157 |
| C  | -3.28746 | -1.33226 | -0.11837 |
| C  | -3.83427 | 1.386    | 0.01176  |
| H  | -1.72672 | 1.68282  | -0.27859 |
| C  | -4.59226 | -0.88247 | 0.04968  |
| H  | -3.10588 | -2.40302 | -0.17918 |
| C  | -4.88475 | 0.47615  | 0.12108  |
| H  | -4.03447 | 2.45667  | 0.0562   |
| H  | -5.39503 | -1.61601 | 0.12729  |
| H  | -5.90855 | 0.81996  | 0.25543  |
| C  | 0.79811  | 1.68036  | 2.53905  |
| H  | 0.19079  | 2.08289  | 3.36509  |
| H  | 1.73015  | 1.28035  | 2.95304  |
| H  | 1.0472   | 2.49473  | 1.85101  |
| C  | -0.41347 | -0.40248 | 2.74     |
| H  | 0.42621  | -0.95207 | 3.18125  |
| H  | -0.99381 | 0.04597  | 3.56137  |
| H  | -1.05224 | -1.10556 | 2.1961   |
| H  | 1.13237  | -2.7031  | -2.35747 |
| H  | 2.68112  | -2.62053 | -1.38539 |
| O  | 1.85707  | -0.65953 | -2.01081 |
| H  | 1.24196  | -0.52113 | -2.74858 |
| N  | 0.08322  | 0.62439  | 1.81569  |
| H  | -0.74993 | 1.05337  | 1.40507  |
| Ti | 0.97027  | -0.03557 | -0.24157 |
| N  | 0.58086  | 1.64885  | -1.10079 |
| N  | 2.69997  | -0.04353 | 0.61945  |
| C  | 1.51716  | 2.7481   | -0.98308 |
| H  | 0.98832  | 3.71284  | -0.87356 |
| H  | 2.17162  | 2.62525  | -0.11018 |
| H  | 2.16168  | 2.83222  | -1.88029 |
| C  | -0.19647 | 1.79398  | -2.31044 |
| H  | -0.90379 | 0.96356  | -2.42584 |
| H  | -0.77661 | 2.73501  | -2.31264 |
| H  | 0.45852  | 1.82363  | -3.20388 |
| C  | 3.87111  | 0.34086  | -0.14376 |
| H  | 3.60128  | 0.88045  | -1.05693 |
| H  | 4.53134  | 0.99123  | 0.45959  |

|   |         |          |          |
|---|---------|----------|----------|
| H | 4.46429 | -0.54382 | -0.44679 |
| C | 3.11204 | -0.76091 | 1.79777  |
| H | 3.6791  | -1.67687 | 1.53566  |
| H | 3.77366 | -0.14904 | 2.43966  |
| H | 2.25275 | -1.07117 | 2.40374  |

## Product complex

|                                              |                             |
|----------------------------------------------|-----------------------------|
| Zero-point correction=                       | 0.438022 (Hartree/Particle) |
| Thermal correction to Energy=                | 0.464347                    |
| Thermal correction to Enthalpy=              | 0.465291                    |
| Thermal correction to Gibbs Free Energy=     | 0.383297                    |
| Sum of electronic and zero-point Energies=   | -941.254251                 |
| Sum of electronic and thermal Energies=      | -941.227926                 |
| Sum of electronic and thermal Enthalpies=    | -941.226981                 |
| Sum of electronic and thermal Free Energies= | -941.308975                 |

|       | E (Thermal) |                | CV             | S              |
|-------|-------------|----------------|----------------|----------------|
|       | KCal/Mol    | Cal/Mol-Kelvin | Cal/Mol-Kelvin | Cal/Mol-Kelvin |
| Total | 291.382     | 98.098         | 172.570        |                |
| C     | 0.80238     | 2.00496        | -1.33742       |                |
| H     | 1.75411     | 2.16946        | -1.87126       |                |
| H     | 0.00993     | 2.04631        | -2.09674       |                |
| N     | 0.80237     | 0.65859        | -0.75532       |                |
| C     | 0.5717      | 3.10574        | -0.34434       |                |
| H     | 1.23774     | 3.13625        | 0.52417        |                |
| C     | -0.3952     | 4.01498        | -0.45809       |                |
| C     | 2.04727     | 0.14566        | -0.40804       |                |
| C     | 2.2468      | -1.2508        | -0.29706       |                |
| C     | 3.17319     | 0.95926        | -0.14901       |                |
| C     | 3.47433     | -1.78652       | 0.07093        |                |
| H     | 1.42095     | -1.92285       | -0.53299       |                |
| C     | 4.40014     | 0.41176        | 0.20806        |                |
| H     | 3.08967     | 2.04224        | -0.21199       |                |
| C     | 4.56802     | -0.96374       | 0.3309         |                |
| H     | 3.57876     | -2.86951       | 0.13597        |                |
| H     | 5.23705     | 1.0824         | 0.40214        |                |
| H     | 5.52989     | -1.38639       | 0.6141         |                |
| C     | -0.94366    | -1.68941       | 2.46886        |                |
| H     | -0.50566    | -1.9861        | 3.43602        |                |
| H     | -1.90262    | -1.18679       | 2.65648        |                |
| H     | -1.13021    | -2.59062       | 1.87672        |                |
| C     | 0.45332     | 0.2602         | 2.60581        |                |

|    |          |          |          |
|----|----------|----------|----------|
| H  | -0.37984 | 0.8521   | 3.0005   |
| H  | 1.00315  | -0.16231 | 3.46233  |
| H  | 1.12343  | 0.9216   | 2.04596  |
| H  | -1.08461 | 4.00129  | -1.30542 |
| H  | -0.54063 | 4.80504  | 0.27704  |
| O  | -1.73576 | 0.48714  | -2.02829 |
| H  | -2.42995 | 1.15802  | -1.96855 |
| N  | -0.06432 | -0.7884  | 1.72536  |
| H  | 0.74035  | -1.33026 | 1.40385  |
| Ti | -1.02188 | -0.13472 | -0.41534 |
| N  | -1.13938 | -1.99018 | -0.8498  |
| N  | -2.44299 | 0.57698  | 0.65136  |
| C  | -2.22308 | -2.88352 | -0.51688 |
| H  | -2.99969 | -2.89442 | -1.30753 |
| H  | -1.86393 | -3.92269 | -0.40235 |
| H  | -2.70812 | -2.59433 | 0.42468  |
| C  | -0.57252 | -2.33249 | -2.14079 |
| H  | -0.1125  | -3.33694 | -2.11823 |
| H  | -1.34761 | -2.32657 | -2.93004 |
| H  | 0.20447  | -1.61549 | -2.4396  |
| C  | -2.44923 | 1.7533   | 1.48311  |
| H  | -2.84934 | 1.54026  | 2.49377  |
| H  | -1.44043 | 2.171    | 1.5928   |
| H  | -3.08327 | 2.54896  | 1.04632  |
| C  | -3.78451 | 0.15276  | 0.32448  |
| H  | -4.34258 | -0.14433 | 1.23263  |
| H  | -4.36235 | 0.96078  | -0.16744 |
| H  | -3.78224 | -0.71131 | -0.35391 |

## Experimental Section

**General Considerations.** All the starting materials including amines and alcohols,  $\text{TiCl}_4$ ,  $\text{HNEt}_2$  and solvents were dried and distilled prior to use according to standard procedures. BuLi is used as 1.6 M solution in hexanes. All reactions were performed under an atmosphere of argon using standard Schlenk techniques. NMR spectra were recorded on a Bruker 400 spectrometer using  $\text{CDCl}_3$  as solvent, and the chemical shifts were reported in ppm with respect to the reference (internal  $\text{SiMe}_4$  for  $^1\text{H}$  NMR spectra). The products are known compounds and were identified by comparison with the reported NMR spectra of the compounds in literature.

**Reaction of 2-methylbut-3-en-2-ol with aniline (entry 1).** To a solution of 3.12 mL (5 mmol) of BuLi in 20 mL of dry toluene was added 0.52 mL (5 mmol) of  $\text{HNEt}_2$  at  $-20\text{ }^\circ\text{C}$ , and the mixture was stirred for 1 hour at that temperature. To the mixture was added 0.11 mL (1 mmol) of  $\text{TiCl}_4$  and the mixture was stirred for about 2 h at  $80\text{ }^\circ\text{C}$  until the brown precipitates disappeared and a light yellow solution remained over white precipitates of lithium salt. The mixture was cooled to room temperature and 0.27 mL (3 mmol) of aniline and 0.51 mL (4 mmol) of  $\text{TMSCl}$ . The mixture was stirred for 1 h at  $80\text{ }^\circ\text{C}$ , cooled to room temperature and to the solution was added 0.10 mL (1 mmol) of 2-methylbut-3-en-2-ol. After refluxing for 24 h, the solution was acidified with 5%  $\text{HCl}$ , neutralized with saturated  $\text{NaHCO}_3$  solution, extracted with diethyl ether and dried over  $\text{Na}_2\text{SO}_4$ . The solvent was removed under reduced pressure, and the residue was isolated by column chromatography on silica using  $\text{CH}_2\text{Cl}_2$ /hexanes (1:4 v/v) as eluent to give brown liquid (85 mg, yield 53%).  $^1\text{H}$  NMR: (400MHz,  $\text{CDCl}_3$ )  $\delta = 7.17$  (t,  $J = 7.6$  Hz, 2H), 6.70 (t,  $J = 7.2$  Hz, 1H), 6.60 (d,  $J = 7.9$  Hz, 2H), 5.31 (t,  $J = 6.3$  Hz, 1H), 3.68 (d,  $J = 6.7$  Hz, 2H), 1.74 (s, 3H), 1.71 (s, 3H).

**Reaction of cinnamic alcohol with aniline (entry 2).** The reaction was carried out as above-mentioned procedure in entry 1, using cinnamic alcohol (0.10 mL, 1 mmol) instead of 2-methylbut-3-en-2-ol. Isolation by column chromatography on silica using  $\text{CH}_2\text{Cl}_2$ /hexanes (1:8 v/v) as eluent gave brown liquid (80 mg, yield 38%).  $^1\text{H}$  NMR: (400MHz,  $\text{CDCl}_3$ )  $\delta = 7.17$ -7.30 (m, 7H), 6.63 (t,  $J = 7.4$  Hz, 1H), 6.52 (d,  $J = 7.8$  Hz, 2H), 5.96 (ddd,  $J = 16.9, 10.2, 5.9$  Hz, 1 H), 5.20 (d,  $J = 17.1$  Hz, 1H), 5.15 (d,  $J = 10.2$  Hz, 1H), 4.86 (d,  $J = 5.8$  Hz, 1 H), 3.96 (brs, 1H).

**Reaction of 1-phenylprop-2-en-1-ol with aniline (entry 3).** The reaction was carried out as above-mentioned procedure in entry 1, using 1-phenylprop-2-en-1-ol (0.13 g, 1 mmol) instead of 2-methylbut-3-en-2-ol. Isolation by column chromatography on silica using  $\text{CH}_2\text{Cl}_2$ /hexanes (1:4 v/v) as eluent gave brown liquid (51 mg, yield 24%).  $^1\text{H}$  NMR: (400MHz,  $\text{CDCl}_3$ )  $\delta = 7.37$  (d,  $J = 7.5$  Hz, 2H), 7.31 (t,  $J = 7.5$  Hz, 2H), 7.23 (d,  $J = 6.8$  Hz, 1H), 7.19 (t,  $J = 7.7$  Hz, 2H), 6.73 (t,  $J = 7.3$  Hz,

1H), 6.67 (d,  $J = 8.0$  Hz, 2H), 6.62 (d,  $J = 16.1$  Hz, 1H), 6.33 (dt,  $J = 15.9, 5.7$  Hz, 1H), 3.94 (d,  $J = 5.7$  Hz, 2H), 3.84 (brs, 1H).

**Reaction of 2-methylbut-3-en-2-ol with aniline employing  $\text{Ti}(\text{NMe}_2)_4$  (entry 4).** To a solution of 224 mg (1 mmol) of  $\text{Ti}(\text{NMe}_2)_4$  in 20 mL of dry toluene was added 0.27 mL (3 mmol) of aniline and 0.10 mL (1 mmol) of 2-methylbut-3-en-2-ol. After refluxing for 24 h, the reaction mixture was worked up and purified as in entry 1 to give brown liquid (80 mg, yield 50%). The product has same  $^1\text{H}$  NMR as that in entry 1.

**Reaction of 2-methylbut-3-en-2-ol with aniline without  $\text{TMSCl}$  (entry 5).** To a solution of 3.12 mL (5 mmol) of  $\text{BuLi}$  in 20 mL of dry toluene was added 0.52 mL (5 mmol) of  $\text{HNEt}_2$  at  $-20$  °C, and the mixture was stirred for 1 hour at that temperature. To the mixture was added 0.11 mL (1 mmol) of  $\text{TiCl}_4$  and the mixture was stirred for about 2 h at 80 °C until the brown precipitates disappeared and a light yellow solution remained over white precipitates of lithium salt. The mixture was cooled to room temperature and 0.27 mL (3 mmol) of aniline was added. The mixture was stirred for 1 h at 80 °C, cooled to room temperature and to the solution was added 0.10 mL (1 mmol) of 2-methylbut-3-en-2-ol. After refluxing for 24 h, the reaction mixture was worked up and isolated as in entry 1. No  $\text{S}_{\text{N}}2'$  product was obtained while over 80% of 2-methylbut-3-en-2-ol was recovered.

**Reaction of 2-methylbut-3-en-2-ol with aniline (entry 6).** The reaction was carried out as above-mentioned procedure in entry 1, using  $\text{TMSI}$  instead of  $\text{TMSCl}$ . After refluxing for 12 h, aqueous work-up and isolation by column chromatography on silica using  $\text{CH}_2\text{Cl}_2/\text{hexanes}$  (1:4 v/v) as eluent gave brown liquid (122 mg, yield 76%). The product has same  $^1\text{H}$  NMR as that in entry 1.

**Reaction of 2-methylbut-3-en-2-ol with aniline at 80 °C (entry 7).** The reaction was carried out as above-mentioned procedure in entry 4 but at 80 °C. After refluxing for 12 h, aqueous work-up and isolation by column chromatography on silica using  $\text{CH}_2\text{Cl}_2/\text{hexanes}$  (1:4 v/v) as eluent gave brown liquid (81 mg, yield 50%). The product has same  $^1\text{H}$  NMR as that in entry 1.

**Reaction of 1-phenylprop-2-en-1-ol with aniline (entry 8).** The reaction was carried out as above-mentioned procedure in entry 3, using  $\text{TMSI}$  instead of  $\text{TMSCl}$ . After refluxing for 12 h, aqueous work-up and isolation by column chromatography on silica using  $\text{CH}_2\text{Cl}_2/\text{hexanes}$  (1:4 v/v) as eluent gave brown liquid (162 mg, yield 76%). The product has same  $^1\text{H}$  NMR as that in entry 3.

**Reaction of but-3-en-2-ol with aniline (entry 9).** The reaction was carried out as above-mentioned procedure in entry 4, using but-3-en-2-ol instead of 2-methylbut-3-en-2-ol. Isolation by column chromatography on silica using  $\text{CH}_2\text{Cl}_2/\text{hexanes}$  (1:4 v/v) as eluent gave brown liquid (104 mg, yield 71%), *cis:trans* = 1:10 according to NMR spectrum.  $^1\text{H}$  NMR: (400MHz,  $\text{CDCl}_3$ )  $\delta = 7.17$  (dd,  $J = 8.5, 1.2$  Hz, 2H), 6.70

(t,  $J = 7.3$  Hz, 1H), 6.62 (dd,  $J = 8.6, 1.0$  Hz, 2H), 5.76-5.68 (m, 1H), 5.64-5.56 (m, 1H), 3.68 (d,  $J = 5.7$  Hz, 2H), 1.70 (dd,  $J = 6.3, 1.2$  Hz, 3H).

**Reaction of 2-methylbut-3-en-2-ol with 4-chloroaniline (entry 10).** The reaction was carried out as above-mentioned procedure in entry 4, using 4-chloroaniline instead of aniline. Isolation by column chromatography on silica using  $\text{CH}_2\text{Cl}_2$ /hexanes (1:4 v/v) as eluent gave brown liquid (132 mg, yield 67%).  $^1\text{H}$  NMR (400 MHz,  $\text{CDCl}_3$ )  $\delta = 7.11$  (d,  $J = 8.8$  Hz, 2H), 6.52 (d,  $J = 8.8$  Hz, 2H), 5.30 (t,  $J = 6.6$  Hz, 1H), 3.65 (d,  $J = 6.7$  Hz, 2H), 3.60 (brs, 1H), 1.75 (s, 3H), 1.71 (s, 3H).

**Reaction of 2-methylbut-3-en-2-ol with 4-bromoaniline (entry 11).** The reaction was carried out as above-mentioned procedure in entry 4, using 4-bromoaniline instead of aniline. Isolation by column chromatography on silica using  $\text{CH}_2\text{Cl}_2$ /hexanes (1:4 v/v) as eluent gave brown liquid (173 mg, yield 72%).  $^1\text{H}$  NMR (400 MHz,  $\text{CDCl}_3$ )  $\delta = 7.24$  (d,  $J = 8.2$  Hz, 2H), 6.48 (d,  $J = 8.2$  Hz, 2H), 5.29 (t,  $J = 5.9$  Hz, 1H), 3.64 (d,  $J = 6.5$  Hz, 2H), 3.62 (brs, 1H), 1.75 (s, 3H), 1.71 (s, 3H).

**Reaction of 2-methylbut-3-en-2-ol with 4-methylaniline (entry 12).** The reaction was carried out as above-mentioned procedure in entry 4, using 4-methylaniline instead of aniline. Isolation by column chromatography on silica using  $\text{CH}_2\text{Cl}_2$ /hexanes (1:8 v/v) as eluent gave brown liquid (75 mg, yield 43%).  $^1\text{H}$  NMR (400 MHz,  $\text{CDCl}_3$ )  $\delta = 6.99$  (d,  $J = 8.3$  Hz, 2H), 6.54 (d,  $J = 8.3$  Hz, 2H), 5.32 (dd,  $J = 9.5, 4.0$  Hz, 1H), 3.66 (d,  $J = 6.7$  Hz, 2H), 3.46 (brs, 1H), 2.24 (s, 3H), 1.74 (s, 3H), 1.70 (s, 3H).

**Reaction of 2-methylbut-3-en-2-ol with 2-iodoaniline (entry 13).** The reaction was carried out as above-mentioned procedure in entry 4, using 2-iodoaniline instead of aniline. Isolation by column chromatography on silica using  $\text{CH}_2\text{Cl}_2$ /hexanes (1:4 v/v) as eluent gave brown liquid (81 mg, yield 28%).  $^1\text{H}$  NMR (400 MHz,  $\text{CDCl}_3$ )  $\delta = 7.65$  (d,  $J = 7.7$  Hz, 1H), 7.21 (t,  $J = 7.6$  Hz, 1H), 6.56 (d,  $J = 8.1$  Hz, 1H), 6.44 (t,  $J = 7.4$  Hz, 1H), 5.34 (t,  $J = 6.2$  Hz, 1H), 4.09 (s, 1H), 3.72 (d,  $J = 5.4$  Hz, 2H), 1.77 (s, 3H), 1.73 (s, 3H).

**Reaction of 2-methylbut-3-en-2-ol with 2-trifluoromethylaniline (entry 14).** The reaction was carried out as above-mentioned procedure in entry 4, using 2-trifluoromethylaniline instead of aniline. Isolation by column chromatography on silica using  $\text{CH}_2\text{Cl}_2$ /hexanes (1:4 v/v) as eluent gave brown liquid (88 mg, yield 38%).  $^1\text{H}$  NMR (400 MHz,  $\text{CDCl}_3$ )  $\delta = 7.42$  (d,  $J = 7.8$  Hz, 1H), 7.36 (t,  $J = 7.8$  Hz, 1H), 6.71 (d,  $J = 7.9$  Hz, 1H), 6.70 (t,  $J = 7.4$  Hz, 1H), 5.32 (tt,  $J = 6.7, 1.3$  Hz, 1H), 4.27 (brs, 1H), 3.73 (t,  $J = 5.6$  Hz, 2H), 1.76 (s, 3H), 1.72 (s, 3H).

**Reaction of 2-methylbut-3-en-2-ol with pyridine-2-amine (entry 15).** The reaction was carried out as above-mentioned procedure in entry 4, using pyridine-2-amine instead of aniline. Isolation by column chromatography on silica using  $\text{CH}_2\text{Cl}_2$ /hexanes (1:4 v/v) as eluent gave brown liquid (62 mg, yield 38%).  $^1\text{H}$  NMR

(400 MHz, CDCl<sub>3</sub>)  $\delta$  = 8.02 (d,  $J$  = 3.7 Hz, 1H), 7.34 (t,  $J$  = 7.1 Hz, 1H), 6.49 (t,  $J$  = 6.2 Hz, 1H), 6.30 (d,  $J$  = 8.4 Hz, 1H), 5.25 (t,  $J$  = 6.5 Hz, 1H), 4.36 (s, 1H), 3.77 (t,  $J$  = 5.7 Hz, 2H), 1.68 (s, 3H), 1.64 (s, 3H).



# <sup>1</sup>H NMR of the Products

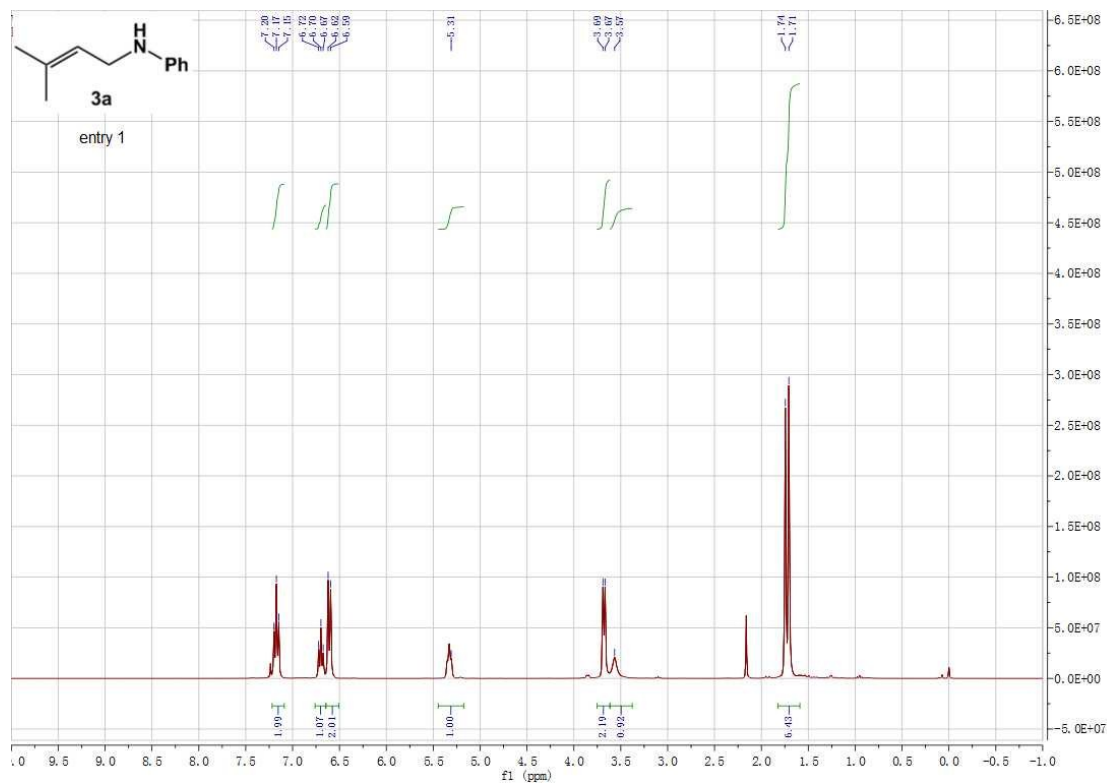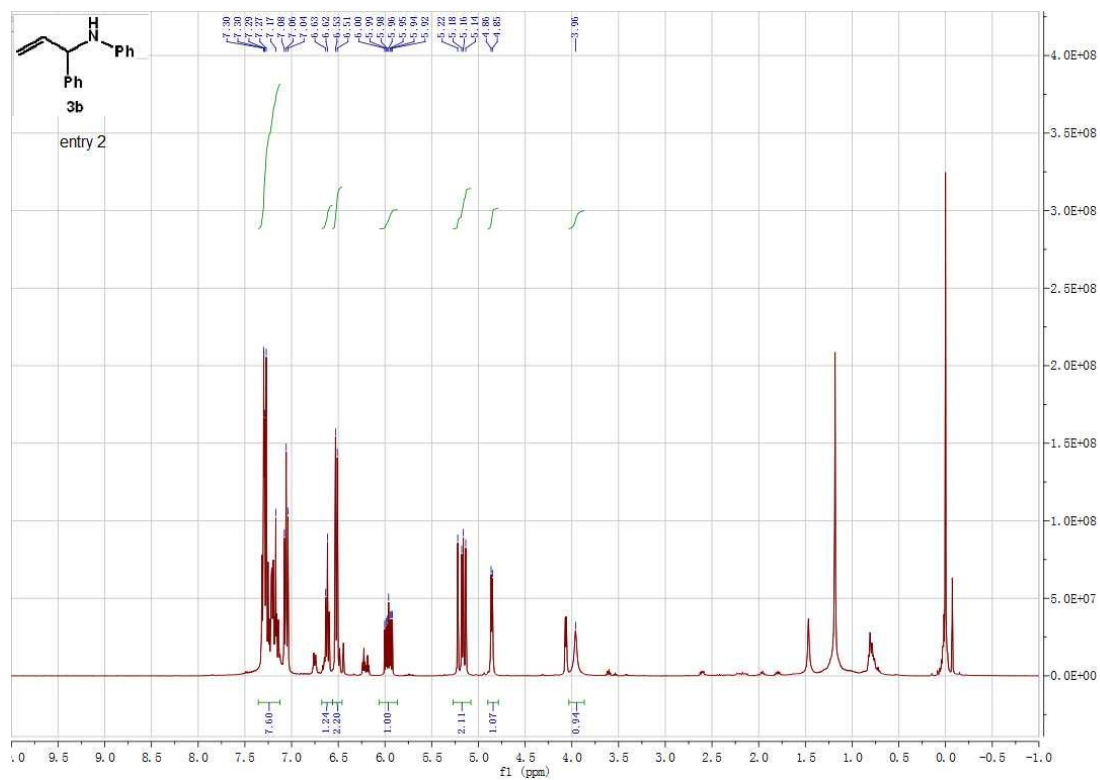

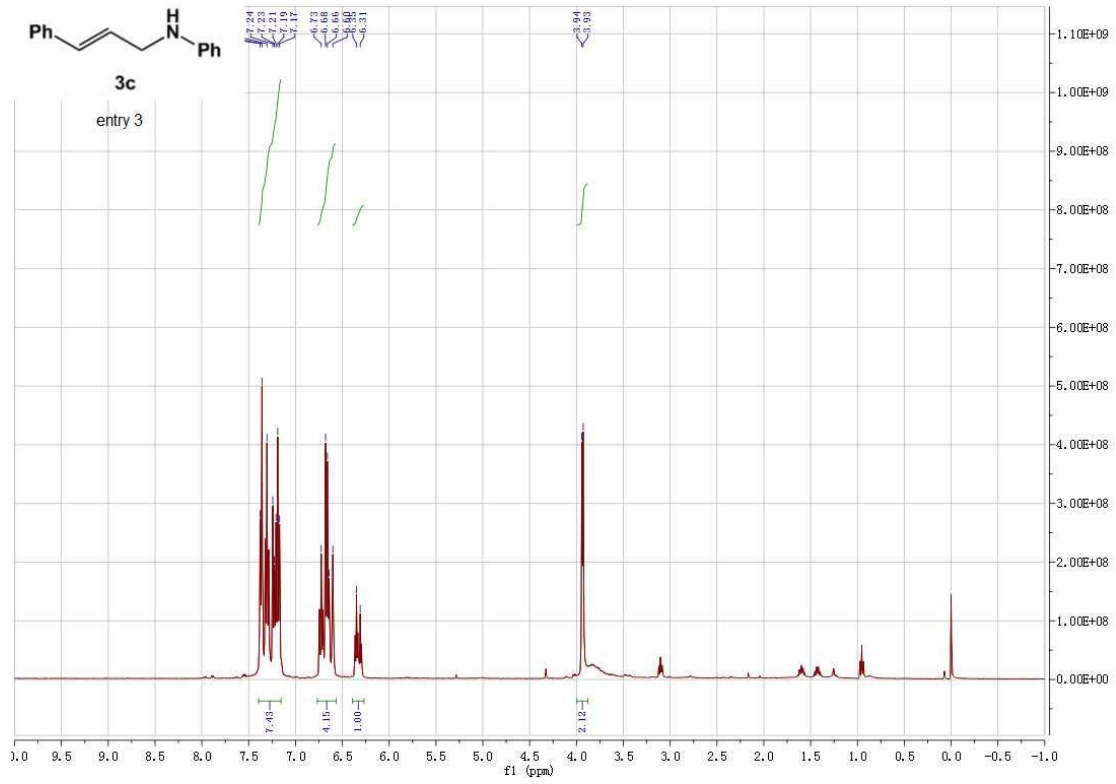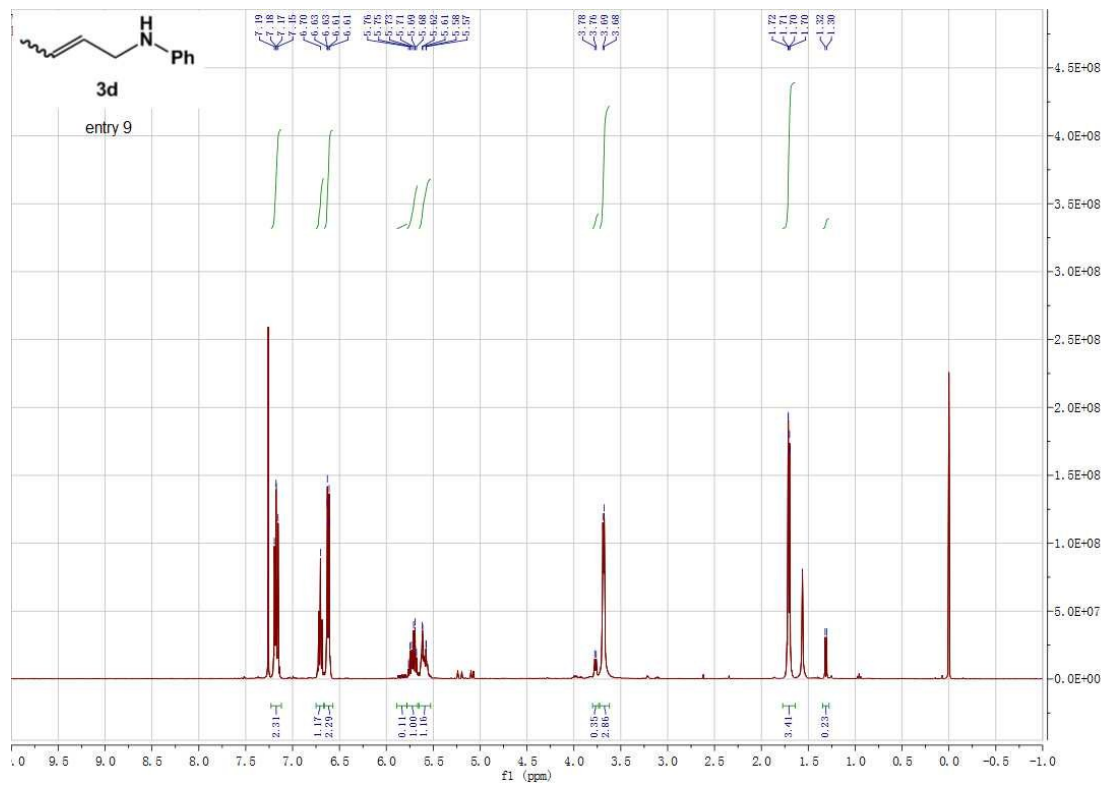

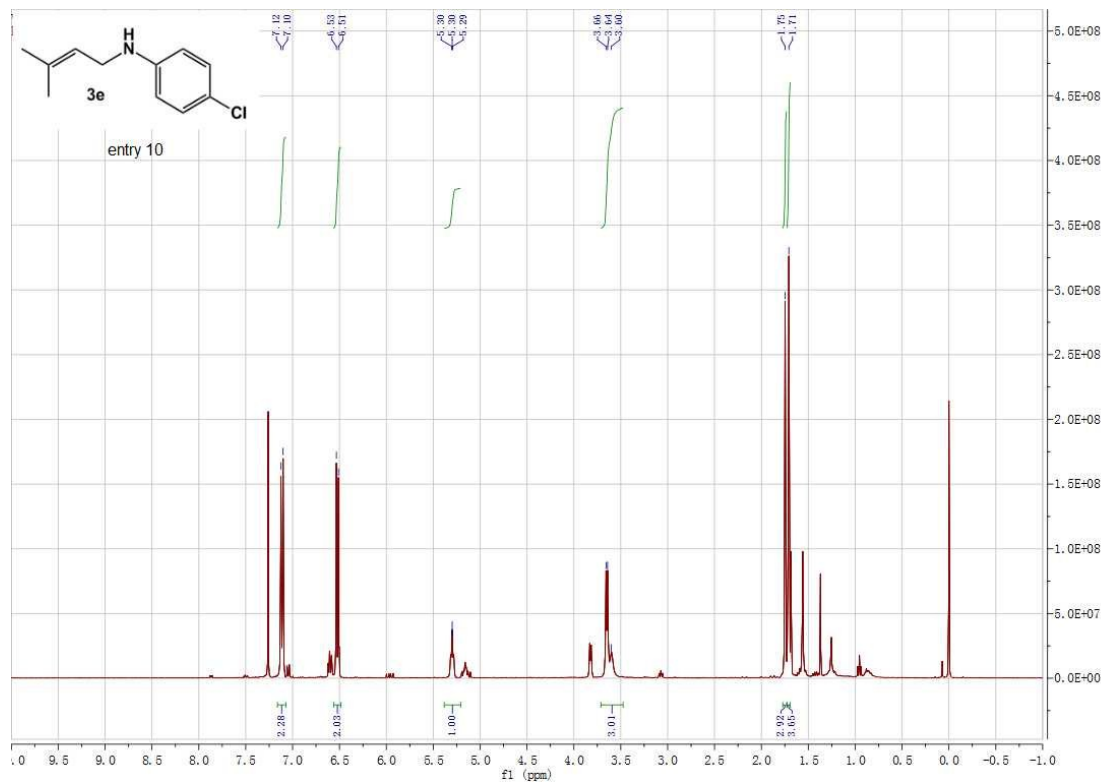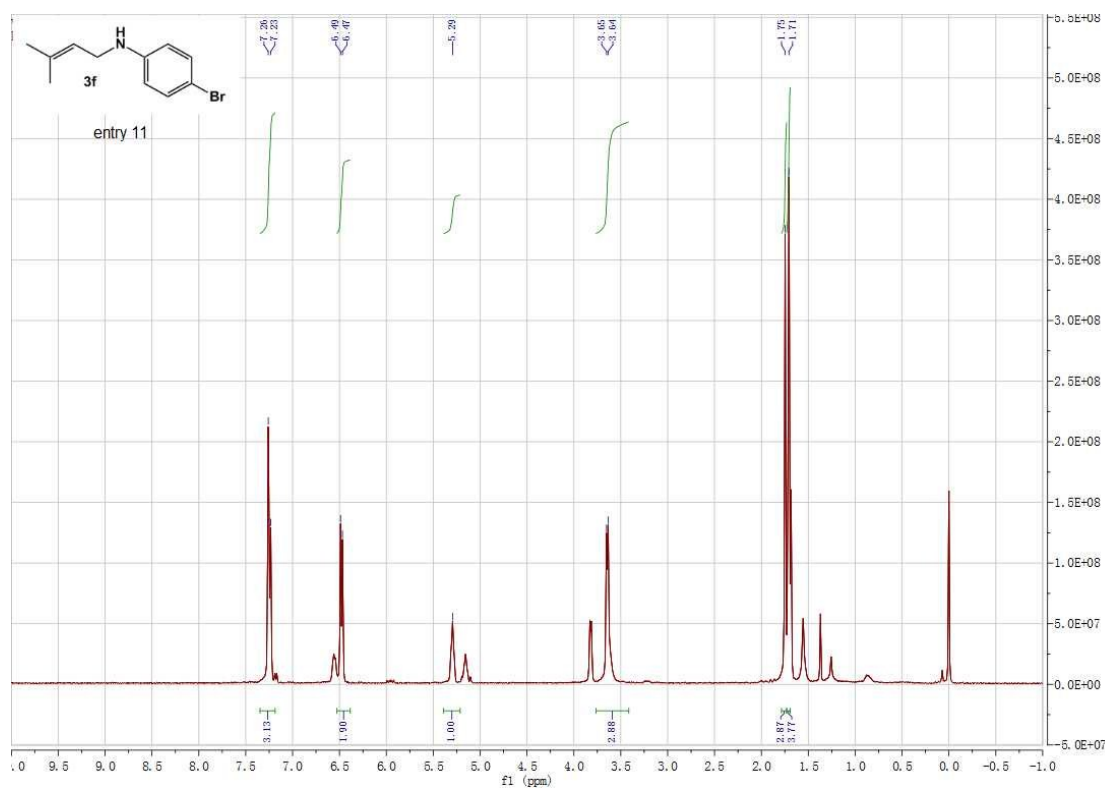

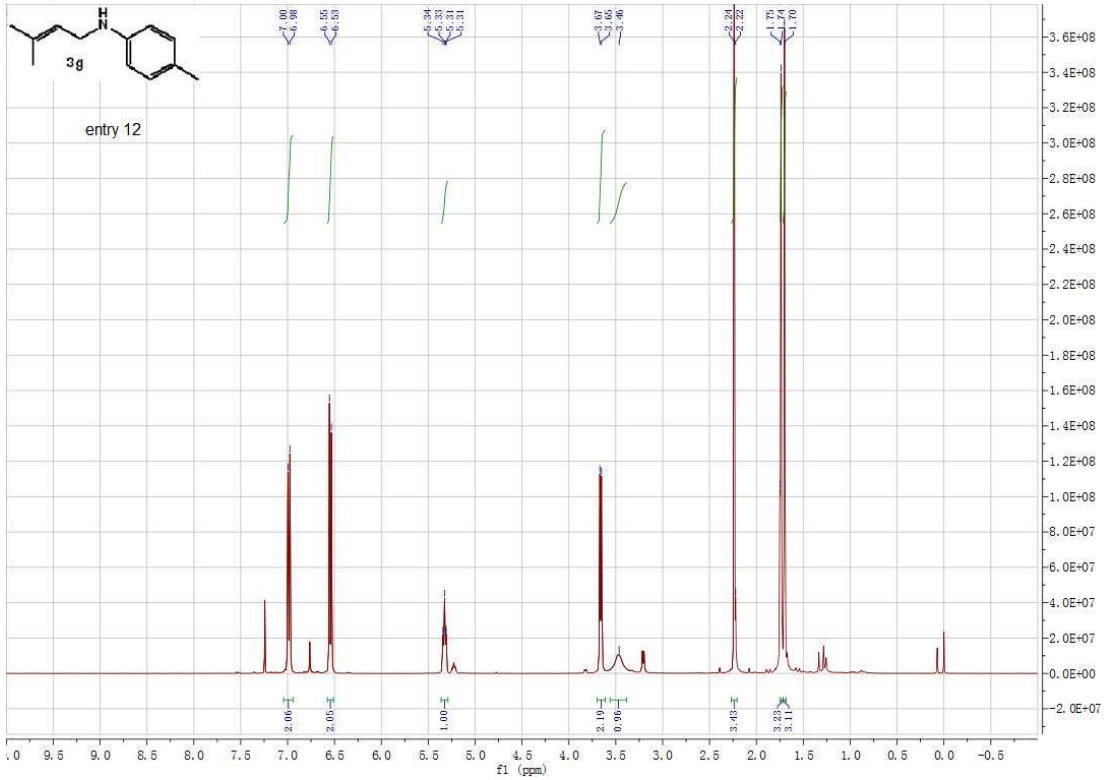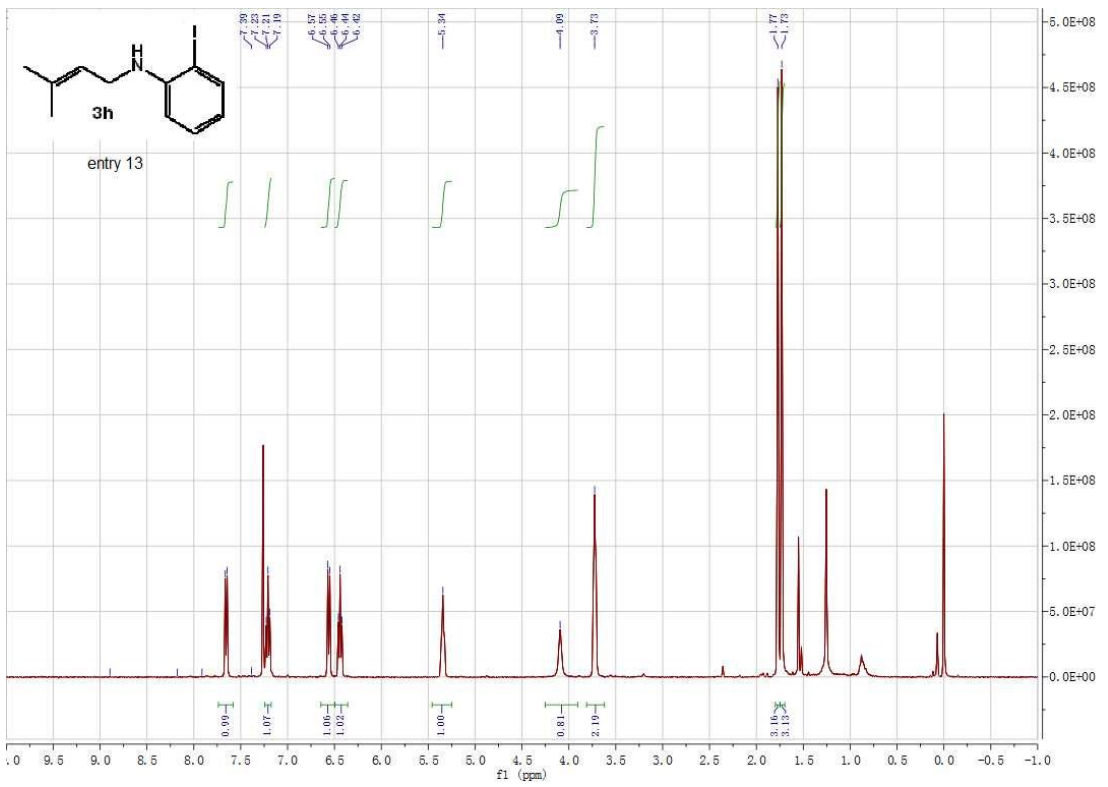

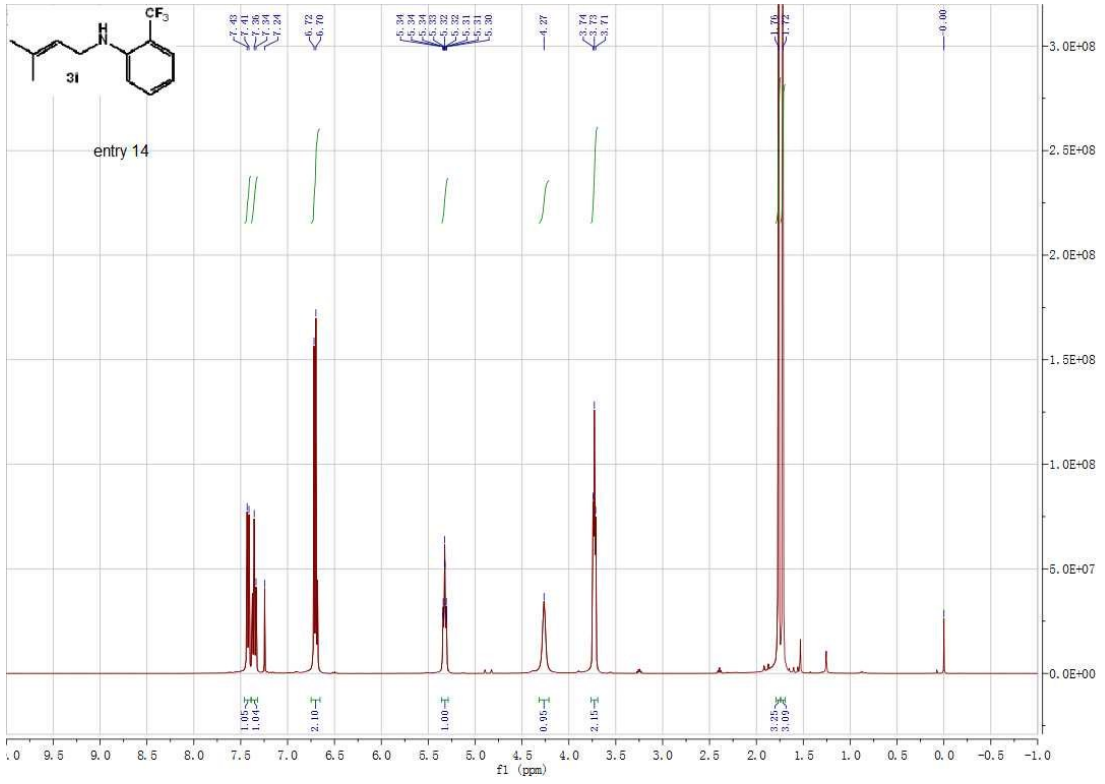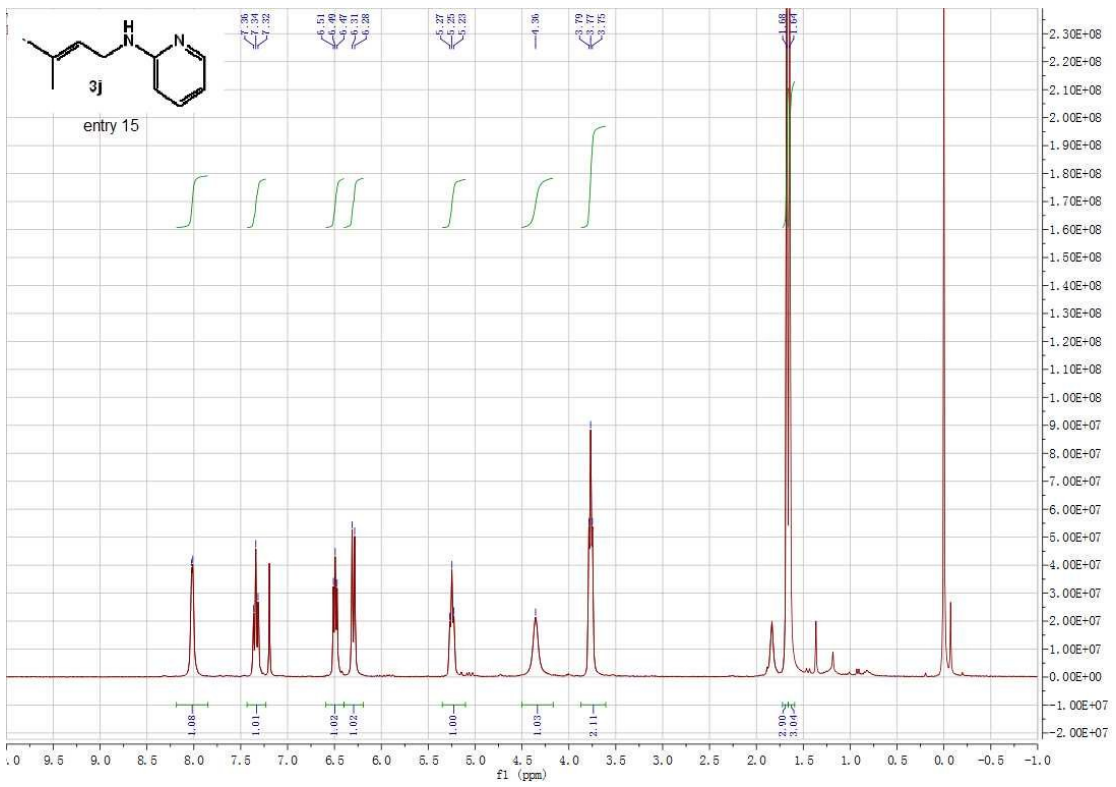

## Kinetic experiments

The reaction of 2-methylbut-3-en-2-ol with 4-chloroaniline was selected in the kinetic study for the simplification of NMR. Diphenylmethane was added into the reaction mixture as an internal standard for integral. To a solution of 3.12 mL (5 mmol) of BuLi in 6 mL of dry toluene was added 0.52 mL (5 mmol) of HNEt<sub>2</sub> at -20 °C, and the mixture was stirred for 1 hour at that temperature. To the mixture was added 0.11 mL (1 mmol) of TiCl<sub>4</sub> and the mixture was stirred for about 2 h at 80 °C until the brown precipitates disappeared and a light yellow solution remained over white precipitates of lithium salt. The mixture was cooled to room temperature and 128 mg (1 mmol) of 4-chloroaniline and 0.51 mL (4 mmol) of TMSCl. The mixture was stirred for 1 h at 80 °C, cooled to room temperature and to the solution was added 0.10 mL (1 mmol) of 2-methylbut-3-en-2-ol and 168 mg (1 mmol) of diphenylmethane. The mixture was divided into four portions for parallel experiments that were terminated after 1 h, 2 h, 4 h and 8 h respectively. After refluxing for a certain period of time, the solution was acidified with 5% HCl, neutralized with saturated NaHCO<sub>3</sub> solution, extracted with diethyl ether and dried over Na<sub>2</sub>SO<sub>4</sub>, and the solvent was removed under reduced pressure. Proton spectra were obtained under consistent conditions and the integral of the signals at 6.59 and 6.52 ppm were adopted to measure the amount of 4-chloroaniline and the product, using diphenylmethane as the internal standard for integral. The concentration of 4-chloroaniline at different reaction time were listed in Table S1 and the data were used to gain the second order rate constant (Figure S1).

Table S1.

| Time (h)              | 1     | 2     | 4     | 8     |
|-----------------------|-------|-------|-------|-------|
| Concentration (mol/L) | 0.064 | 0.059 | 0.049 | 0.034 |

Figure S1. Change of 4-chloroaniline concentration over time.

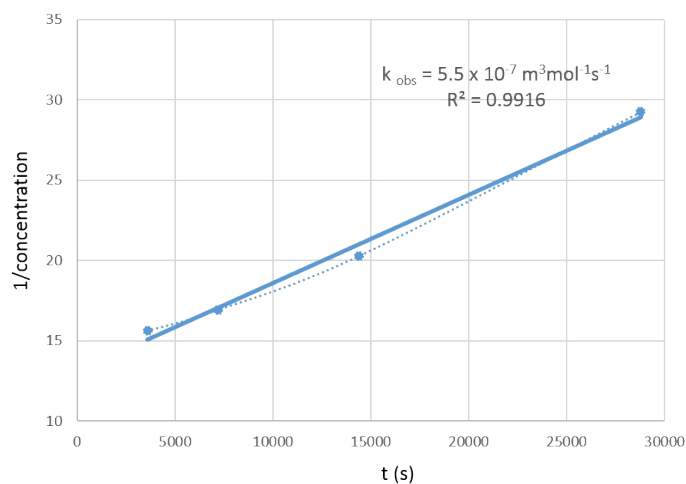

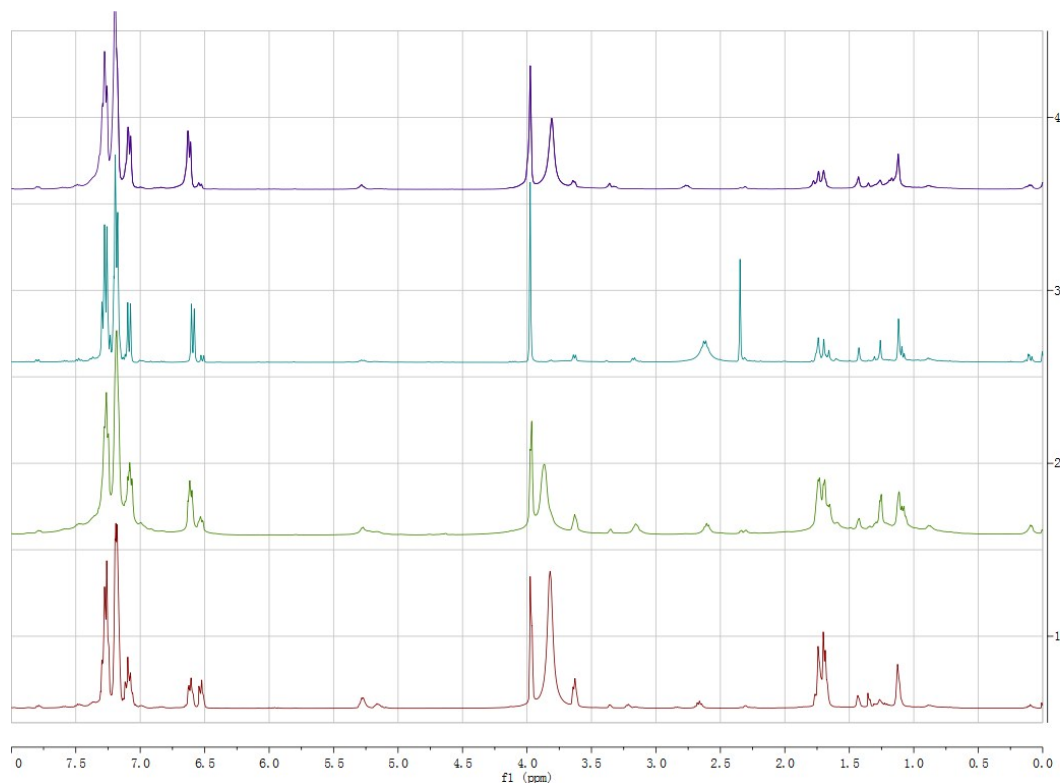

### Correlation of reaction barriers with Arrhenius equation

Correlation of reaction barriers between the designed reaction and the  $\text{Ti}(\text{NMe}_2)_4$ -mediated reaction in literature was derived with Arrhenius equation.

$$k = Ae^{-E_a/RT}$$

$$\ln \frac{k_2}{k_1} = \frac{E_{a1}}{RT_1} - \frac{E_{a2}}{RT_2}$$

to gain a similar reaction rate, where  $k_2 = k_1$ ,

$$\frac{E_{a1}}{RT_1} = \frac{E_{a2}}{RT_2}$$

Where  $E_{a1} = 43.1$  kcal/mol and  $T_1 = 433$  K (160 °C) for the  $\text{Ti}(\text{NMe}_2)_4$ -mediated reaction in literature, and an expected  $T_2 = 383$  K (110 °C) for the designed reaction, giving an  $E_{a2} = 38.1$  kcal/mol.
